1  
2 **Title:** Sound improves neuronal encoding of visual stimuli in mouse primary visual  
3 cortex

4  
5  
6  
7 **Authors:** Aaron M. Williams<sup>1,2,3</sup>, Christopher F. Angeloni<sup>1,4</sup>, Maria N. Geffen<sup>1,2,3</sup>

8  
9  
10 **Affiliations:**  
11 <sup>1</sup>Department of Otorhinolaryngology, University of Pennsylvania, Philadelphia, United  
12 States  
13 <sup>2</sup>Department of Neuroscience, University of Pennsylvania, Philadelphia, United States  
14 <sup>3</sup>Department of Neurology, University of Pennsylvania, Philadelphia, United States  
15 <sup>4</sup>Department of Psychology, University of Pennsylvania, Philadelphia, United States

16  
17  
18  
19 **Corresponding author:** Maria Neimark Geffen  
20 Stemmler Hall G10  
21 3450 Hamilton Walk  
22 Philadelphia, PA 19104  
23 mgeffen@penmedicine.upenn.edu

24  
25 **Number of pages:** 29

26  
27 **Number of figures:** 9

28  
29 **Abstract word count:** 267

30 **Introduction word count:** 850

31 **Discussion word count:** 2053

32  
33 **Keywords:** audiovisual integration, primary visual cortex, stimulus decoding,  
34 electrophysiology

35  
36 **Preprint:** published on BioRxiv <https://doi.org/10.1101/2021.08.03.454738>

37  
38 **Acknowledgements**

39 The authors thank Gabrielle Samulewicz for assistance with experiments and members  
40 of the Geffen laboratory for helpful discussions, as well as Dr. Jay Gottfried and Dr. Yale  
41 Cohen at the University of Pennsylvania. This work was supported by funding by the  
42 National Institute on Deafness and Other Communication Disorders at the National  
43 Institute of Health grants 5T32DC016903 to AMW, F31DC016524 to CFA, and  
44 R01DC015527, R01DC014479, and R01NS113241 to MNG.

45  
46

## 47 **Abstract**

48 In everyday life, we integrate visual and auditory information in routine tasks such as navigation  
49 and communication. Whereas concurrent sound can improve visual perception, the neuronal  
50 correlates of this audiovisual integration are not fully understood. Specifically, it remains  
51 unknown whether sound-induced improvement in detection and discriminability of visual stimuli  
52 is reflected in neuronal firing patterns in the primary visual cortex (V1). Furthermore,  
53 presentation of sound can induce movement in the subject, but little is understood about  
54 whether and how sound-induced movement affects audiovisual integration in V1. We  
55 investigated how sound and movement interact to modulate V1 visual responses in awake,  
56 head-fixed mice and whether this interaction improves neuronal encoding of the visual stimulus.  
57 We presented visual drifting gratings with and without simultaneous auditory white noise to  
58 awake male and female mice while recording mouse movement and V1 neuronal activity.  
59 Sound modulated light-evoked activity of 80% of light-responsive neurons, with 95% of neurons  
60 increasing activity when the auditory stimulus was present. Sound consistently induced  
61 movement. However, a generalized linear model revealed that sound and movement had  
62 distinct and complementary effects of the neuronal visual responses. Furthermore, decoding of  
63 the visual stimulus from the neuronal activity was improved with sound, even when controlling  
64 for movement. Thus, sound and movement modulate visual responses in complementary ways,  
65 improving neuronal representation of the visual stimulus. This study clarifies the role of  
66 movement as a potential confound in neuronal audiovisual responses and expands our  
67 knowledge of how multimodal processing is mediated in the awake brain.

68

## 69 **Significance statement**

70 Sound and movement are both known to modulate visual responses in the primary visual  
71 cortex, however sound-induced movement has largely remained unaccounted for as a potential  
72 confound in audiovisual studies in awake animals. Here, authors found that sound and  
73 movement both modulate visual responses in an important visual brain area, the primary visual  
74 cortex, in distinct, yet complementary ways. Furthermore, sound improved encoding of the  
75 visual stimulus even when accounting for movement. This study reconciles contrasting theories  
76 on the mechanism underlying audiovisual integration and asserts the primary visual cortex as a  
77 key brain region participating in tripartite sensory interactions.

78

79

## 80 **Introduction**

81

82 Our brains use incoming sensory information to generate a continuous perceptual experience  
83 across sensory modalities. The neuronal systems underlying sensory perception of different  
84 modalities interact in a way that often improves perception of the complementary modality  
85 (Gingras et al., 2009; Gleiss and Kayser, 2012; Bigelow and Poremba, 2016; Hammond-Kenny  
86 et al., 2017; Meijer et al., 2018; Stein et al., 2020). In the audiovisual realm, it is often easiest to  
87 understand what someone is saying in a crowded room by additionally relying on visual cues  
88 such as lip movement and facial expression (Maddox et al., 2015; Tye-Murray et al., 2016). The  
89 McGurk effect and flash-beep illusion are other common perceptual phenomena that  
90 demonstrate mutual interactions between the auditory and visual systems (McGurk and  
91 MacDonald, 1976; Shams et al. 2002).

92

93 The benefits of additional sensory modalities on unisensory processing do not just apply to  
94 complex vocal and auditory behavioral interactions. Concurrent sounds such as auditory white  
95 noise and pure tones improve sensitivity to and discriminability of visual contrast gradients in  
96 humans (Lippert et al., 2007; Chen et al., 2011; Tivadar et al., 2020). The use of these basic

97 audiovisual stimuli has demonstrated that the most robust multisensory perceptual  
98 improvements occur around threshold discrimination levels of the otherwise unisensory modality  
99 (Chen et al., 2011; Gleiss and Kayser, 2012; Breman et al., 2017). The relative timing of the  
100 sensory components is also a factor in their integration. Simultaneous onset and offset of the  
101 auditory and visual components strengthens multisensory perceptual improvements compared  
102 to asynchronous stimuli (Lippert et al., 2007). Multisensory integration is often optimal when  
103 modulations in visual intensity and auditory amplitude are temporally congruent (Atilgan et al.,  
104 2018), likely mimicking covariance of multisensory signals from natural objects. Despite this  
105 current understanding of audiovisual integration at a perceptual level, a detailed understanding  
106 of the neuronal code that mediates this improvement has proved elusive.

107  
108 Previous studies of neuronal correlates of audiovisual integration found that the primary sensory  
109 cortical areas participate in this process (Wang et al., 2008; Ibrahim et al., 2016; Meijer et al.,  
110 2019; Deneux et al., 2019). The primary visual cortex (V1) contains neurons whose light-evoked  
111 firing rates are modulated by sound, as well as neurons that are responsive to sound alone  
112 (Knöpfel et al., 2019). Orientation and directional tuning of individual neurons are also affected  
113 by sound. In anesthetized mice, layer 2/3 neurons in V1 exhibited sharpened tuning in the  
114 presence of sound (Ibrahim et al., 2016), providing a potential mechanism through which sound  
115 improves visual encoding. However, another study in awake mice found heterogeneous  
116 changes across neurons in visual tuning curve bandwidth with and without sound (Meijer et al.,  
117 2017). These contrasting findings raise the question of whether previously reported sound-  
118 induced changes in V1 neuronal activity in awake animals resulted in improved visual  
119 processing, and through which coding schemes these effects are mediated. Ultimately, this  
120 hypothesized improvement in visual encoding would provide a missing link between cross-  
121 sensory neuronal responses and the field's current understanding of behavioral and perceptual  
122 effects described above.

123  
124 An important factor that has thus far been unaccounted for in audiovisual studies is that awake  
125 animals are subject to brain-wide changes in neuronal activity due to stimulus-aligned,  
126 uninstructed movements (Musall et al., 2019). Sound-induced movement represents a potential  
127 confound for audiovisual studies in awake animals because whisking and locomotion modulate  
128 neuronal activity in the sensory cortical areas. In V1, movement enhances neuronal visual  
129 responses and improves neuronal encoding of the visual scene (Niell and Stryker, 2010;  
130 Dardalot and Stryker, 2017). Conversely, in the auditory cortex (AC), locomotion suppresses  
131 neuronal spontaneous and auditory responses (Nelson et al., 2013; Schneider and Mooney,  
132 2018; Bigelow et al., 2019). Therefore, the contribution of movement to neuronal responses to  
133 multi-sensory stimuli is likely due to multiple processes and can greatly affect audiovisual  
134 integration.

135  
136 Thus, audiovisual integration in V1 may not simply represent afferent information from auditory  
137 brain regions. Whereas V1 neurons are sensitive to the optogenetic stimulation (Ibrahim et al.,  
138 2016) and pharmacologic suppression (Deneux et al., 2019) of AC neurons, the modulation of  
139 V1 activity may instead be a byproduct of uninstructed sound-induced movements which  
140 themselves modulate visual responses (Bimbard et al., 2021). Here, we tested these alternative  
141 explanations of the extent to which locomotion contributes to audiovisual integration in V1 by  
142 performing extracellular recordings of neuronal activity in V1 while monitoring movement in  
143 awake mice presented with audiovisual stimuli. We used these results to build on prior studies  
144 reporting sound-induced changes in V1 visual responses (Ibrahim et al., 2016; Meijer et al.,  
145 2017; McClure and Polack, 2019), in order to determine whether and through what coding  
146 mechanism this cross-modal interaction improves visual encoding. The audiovisual stimulus  
147 consisted of auditory white noise and visual drifting gratings in order to allow comparison of

148 sound's effect across the visual contrast parameter. We found that the majority of neurons in V1  
149 were responsive to visual and auditory stimuli. Sound and movement exerted distinct yet  
150 complementary effects on shaping the visual responses. Importantly, sound improved  
151 discriminability of the visual stimuli both in individual neurons and at a population level, an effect  
152 that persisted when accounting for movement.

153

## 154 **Materials and methods**

155

### 156 **Mice**

157 All experimental procedures were in accordance with NIH guidelines and approved by the  
158 IACUC at the University of Pennsylvania. Mice were acquired from Jackson Laboratories (5  
159 male, 6 female, aged 10-18 weeks at time of recording; B6.Cast-*Cdh23*<sup>Ah1+</sup> mice [Stock No:  
160 018399]) and were housed at 28°C in a room with a reversed light cycle and food provided ad  
161 libitum. Experiments were carried out during the dark period. Mice were housed individually  
162 after headplate implantation. Euthanasia was performed using CO<sub>2</sub>, consistent with the  
163 recommendations of the American Veterinary Medical Association (AVMA) Guidelines on  
164 Euthanasia. All procedures were approved by the University of Pennsylvania IACUC and  
165 followed the AALAC Guide on Animal Research. We made every attempt to minimize the  
166 number of animals used and to reduce pain or discomfort.

167

### 168 **Data availability**

169 All data including the spike timing from the recordings will be made available on Dryad upon  
170 publication here: <https://doi.org/10.5061/dryad.sxksn033q>

171

### 172 **Surgical procedures**

173 Mice were implanted with skull-attached headplates to allow head stabilization during recording,  
174 and skull-penetrating ground pins for electrical grounding during recording. The mice were  
175 anesthetized with 2.5% isoflurane. A ~1mm craniotomy was performed over the right frontal  
176 cortex, where we inserted a ground pin. A custom-made stainless steel headplate (eMachine  
177 Shop) was then placed on the skull at midline, and both the ground pin and headplate were  
178 fixed in place using C&B Metabond dental cement (Parkell). Mice were allowed to recover for 3  
179 days post-surgery before any additional procedures took place.

180

### 181 **Electrophysiological recordings**

182 All recordings were carried out inside a custom-built acoustic isolation booth. 1-2 weeks  
183 following the headplate and ground pin attachment surgery, we habituated the mice to the  
184 recording booth for increasing durations (5, 15, 30 minutes) over the course of 3 days. On the  
185 day of recording, mice were placed in the recording booth and anesthetized with 2.5%  
186 isoflurane. We then performed a small craniotomy above the left primary visual cortex (V1,  
187 2.5mm lateral of midline, 0-0.5 mm posterior of the lambdoid suture). Mice were then allowed  
188 adequate time to recover from anesthesia. Activity of neurons were recorded using a 32-  
189 channel silicon probe (NeuroNexus A1x32-Poly2-5mm-50s-177). The electrode was lowered  
190 into the primary visual cortex via a stereotactic instrument to a depth of 775-1000µm. Following  
191 the audiovisual stimulus presentation, electrophysiological data from all 32 channels were  
192 filtered between 600 and 6000 Hz, and spikes belonging to single neurons and multi-units were  
193 identified in a semi-automated manner using KiloSort2 (Pachitariu et al., 2016).

194

### 195 **Audiovisual stimuli**

196 The audiovisual stimuli were generated using MATLAB (MathWorks, USA), and presented to  
197 mice on a 12" LCD monitor (Eyoyo) with a 60Hz framerate and through a magnetic speaker

198 (Tucker-Davis Technologies) placed to the right of the mouse. The visual stimulus was  
199 generated using the PsychToolBox package for MATLAB and consisted of square wave drifting  
200 gratings 1 s in duration, 4-Hz temporal frequency, and 0.1 cycles/°. The gratings moved in 12  
201 directions, evenly spaced 0°-360°, and were scaled to a range of 5 different visual contrast  
202 levels (0, 0.25, 0.5, 0.75, 1), totaling 60 unique visual stimuli. The auditory stimulus was  
203 sampled at 400 kHz and consisted of a 1 s burst of 70 dB white noise. The visual grating was  
204 accompanied by the auditory noise on half of trials (120 unique trial types, 10 repeats each),  
205 with simultaneous onset and offset. A MATLAB-generated TTL pulse aligned the onset of the  
206 auditory and visual stimuli, and was verified using a ThorLabs photodetector and microphone.  
207 This TTL pulse was also used to align the electrophysiological recording data with the  
208 audiovisual stimulus trials. The auditory-only condition corresponded to the trials with a visual  
209 contrast of 0. The trial order was randomized and was different for each recording.

210

### 211 **Data analysis and statistical procedures**

212 Spiking data from each recorded unit was organized by trial type and aligned to the trial onset.  
213 The number of spikes during each trial's first 0-300ms was input into a generalized linear model  
214 (GLM; predictor variables: visual contrast [continuous variable 0, 0.25, 0.5, 0.75, 1], sound [0 or  
215 1]; response variable: number of spikes during 0-300ms; Poisson distribution, log link function),  
216 allowing the classification of each neuron's responses as having a main effect ( $p < 0.05$ ) of light,  
217 sound, and/or a light-sound interaction. Neurons that were responsive to both light and sound or  
218 had a significant light-sound interaction term were classified as "light-responsive sound-  
219 modulated." To quantify the supra- or sub-linear integration of the auditory and visual  
220 responses, we calculated the linearity ratio of neurons' audiovisual responses. This ratio was  
221 defined as  $FR_{AV} / (FR_V + FR_A)$ , and the sound-only response  $FR_A$  was calculated using the trials  
222 with a visual contrast of 0.

223

224 We calculated mutual information (MI) between neuronal responses and the five different visual  
225 contrast level, as well as between neuronal responses and the 12 different drifting grating  
226 directions, in order to guide the response time window used for our subsequent analyses. We  
227 calculated mutual information according to the equations (Borst and Theunissen, 1999):  
228

229

$$I(R, S) = H(R) - H(R|S)$$

230

$$H(R) = - \sum_i p(r_i) \log_2 p(r_i)$$

231

$$H(R|S) = - \sum_j p(s_j) \sum_i p(r_i|s_j) \log_2 p(r_i|s_j)$$

232

233 where  $I(R,S)$  is the MI between the neuronal response  $R$  and visual stimulus  $S$ ,  $H(R)$  is the  
234 entropy of neuronal response  $R$ , and  $H(R|S)$  is the entropy of neuronal response  $R$  given the  
235 stimulus  $S$ .  $S_j$  represents the stimulus parameter either visual contrast or grating direction, and  $r_i$   
236 represents the number of spikes in a specific time window. We used a sliding 10ms time window  
237 to serially calculate MI with the visual stimulus across the neuronal response. We then averaged  
238 the MI trace across neurons to generate a population mean trace.

239

240 We quantified changes in response timing by calculating response latency, onset slope, and  
241 onset response duration. First, mean peristimulus time histograms (PSTH) were constructed for  
242 each trial type using a 10 ms sliding window. The latency was calculated as the first time bin  
after stimulus onset in which the mean firing rate at full contrast exceeded 1 standard deviation



243 above baseline. The slope Hz/ms slope was calculated from the trial onset to the time of the  
244 peak absolute value firing rate. The response duration was calculated using the full width at half  
245 maximum of the peak firing rate at stimulus onset (limited to 0-300 ms).

246  
247  
248 Orientation selectivity and direction selectivity were determined for all light-responsive neurons.  
249 The preferred direction of each direction-selective neuron was defined as the drifting grating  
250 direction that evoked the largest mean firing rate at the highest contrast level ( $FR_{pref}$ ). We  
251 calculated orientation and direction-selective indices (Zhao et al., 2013) for each neuron  
252 according to:

253  
254 
$$OSI = \frac{FR_{pref} - FR_{ortho}}{FR_{pref} + FR_{ortho}} \quad DSI = \frac{FR_{pref} - FR_{antipref}}{FR_{pref} + FR_{antipref}}$$

255  
256 where  $FR_{ortho}$  and  $FR_{antipref}$  are the mean firing rates in the orthogonal ( $90^\circ$ ) and anti-preferred  
257 ( $180^\circ$ ) directions, respectively. One-tailed permutation testing was performed by comparing  
258 these OSI and DSI values to pseudo OSI and DSI values obtained by 200 random shuffles of  
259 the firing rates from the pooled preferred and orthogonal or anti-preferred trials. If a neuron's  
260 actual OSI or DSI value was  $>95\%$  of shuffled OSI or DSI values, the neuron was classified as  
261 "orientation-" or "direction-selective," respectively. To determine whether there were statistically  
262 significant changes in the preferred direction from the visual to audiovisual conditions, we  
263 applied a bootstrapping procedure, subsampling the visual trials for each neuron 1000 times  
264 and creating a confidence interval of the mean shift in preferred direction (degrees) for each  
265 population randomization.

266  
267 We assessed and controlled for sound-induced movement as a potential confound for the  
268 audiovisual effects observed. During a subset of V1 recordings (9 recordings, 5 mice), mouse  
269 movement was tracked throughout stimulus presentation. Video recording was performed using  
270 a Raspberry Pi 4 Model B computer system with an 8MP infrared Raspberry Pi NoIR Camera  
271 V2 attachment. The camera was positioned to the front and left of the mice, which allowed  
272 capture of primarily the forepaw and whisking motion but with more limited hindpaw motion  
273 visualization. The video was converted to MP4 format, and motion was quantified by calculating  
274 the frame-by-frame difference, i.e. the percentage of pixels that differed from the prior video  
275 frame. This approach captured both whisking and locomotive behavior. This movement value  
276 for each recording was then aligned to the trials of the audiovisual stimulus from the recording  
277 trials for further analysis.

278  
279 Similar to above, a GLM (predictor variables: visual contrast level, sound presence, average  
280 motion during each trial; response variable: trial spikes during 0-300ms; Poisson distribution, log  
281 link function) classified each neuron as having a main effect ( $p < 0.05$ ) of light, sound, or motion,  
282 as well as the pairwise interactions of these parameters. Light-responsive sound-modulated  
283 neurons, according to the above definition, that additionally displayed either a main effect of  
284 motion or significant light-motion or sound-motion interaction terms were classified as "motion-  
285 modulated" and were included for further analysis.

286  
287 We visualized the overall distribution of mouse subject movement across trials by calculating a  
288 z-score for each trial. The movement during the trial was first compared to the baseline 100ms  
289 prior to the trial onset in order to obtain a normalized value. These normalized values were then  
290 pooled together, and we subtracted the group average and divided by the group standard  
291 deviation in order to obtain a z-score for each trial, which represented whether the mouse  
292 moved more or less compared to other trials.

293  
294 In order to reconstruct peristimulus time histograms of light-responsive, sound-modulated,  
295 motion-modulated neurons, we used a separate GLM. Using a 10ms sliding window across all  
296 trials, we input the visual contrast level, sound presence, and motion during that window  
297 (discretized into five bins) as predictor variables, and the number of spikes during that window  
298 as response variables, into the GLM (Poisson distribution, log link function) to calculate  
299 coefficients for light, sound, motion, and their pairwise interactions. This approach allowed us to  
300 reconstruct the mean PSTH of individual neurons observed during each trial type by calculating:  
301

$$\text{Spikes}_t = \exp \left( \sum_i p_{t,i} \cdot c_{t,i} \right)$$

302  
303 where the spikes in time window  $t$  are determined by the values  $p$  and coefficients  $c$  of predictor  
304 variable  $i$ . From there, we used this same equation to estimate the shape of the PSTHs when  
305 varying sound and motion in order to determine differential effects these parameters had on the  
306 temporal trajectory of neurons' visual responses.  
307

308 The  $d'$  sensitivity index (Stanislaw and Todorov, 1999; von Trapp et al., 2016) was used to  
309 calculate the directional discriminability of direction-selective neurons. The  $d'$  sensitivity index  
310 between two directions  $\theta_1$  and  $\theta_2$  is calculated as:  
311

$$d' = \frac{\mu_{\theta_1} - \mu_{\theta_2}}{\sqrt{\frac{1}{2}(\sigma_{\theta_1}^2 + \sigma_{\theta_2}^2)}}$$

312  
313 where  $\mu_{\theta}$  and  $\sigma_{\theta}$  are the response mean and standard deviation, respectively, for direction  $\theta$ .  
314 For each neuron, the sensitivity index was calculated in a pairwise manner for preferred  
315 direction versus all other directions and then aligned relative to the preferred direction in order to  
316 test sensitivity index as a function of angular distance from preferred direction.  
317

318  
319 We used a maximum likelihood estimate approach (Montijn et al., 2014; Meijer et al., 2017) to  
320 decode the visual stimulus direction from the neuronal responses based on Bayes rule:  
321

$$P(\theta|A_{\text{trial}}) = \frac{P(A_{\text{trial}}|\theta)P(\theta)}{P(A_{\text{trial}})}$$

322  
323 For decoding using individual neurons, the likelihood  $P(A_{\text{trial}}|\theta)$  for each orientation or direction  
324 was computed based on the Poisson response distribution across all trials of that orientation or  
325 direction, with a leave-one-out cross-validation technique in which the probe trial ( $A_{\text{trial}}$ ) was  
326 excluded from the training data. The prior  $P(\theta)$  was uniform, and the normalization term  $P(A_{\text{trial}})$   
327 was similarly applied to all directions. Therefore, the posterior probability  $P(\theta|A_{\text{trial}})$  was  
328 proportional to and based on evaluating the likelihood function at the value of the probe trial. For  
329 orientation-selective neurons, decoding was performed between the preferred and orthogonal  
330 orientations, and for direction-selective neurons, decoding was performed between the  
331 preferred and anti-preferred directions. For decoding using populations of neurons, neurons  
332 were pooled across recording sessions. A similar approach was used; however, here, the  
333 posterior probability  $P(\theta|A_{\text{pop}})$  was proportional to the joint likelihood  $P(A_{\text{pop}}|\theta)$  of the single-trial  
334 activity across all  $N$  neurons in the population ( $A_{\text{pop}}$ ):

335

$$P(A_{pop}|\theta) = \prod_{neuron\ i}^N P(A_{trial}|\theta)_i$$

336

337 With this population-based analysis, pairwise decoding was performed between every  
338 orientation and its orthogonal orientation (1 of 2 options), as well as decoding one direction from  
339 all possible directions (1 of 12 options).

340

341 Additionally, we used a support vector machine (SVM) to corroborate the findings of the MLE-  
342 based decoder. The SVM was implemented using MATLAB's `fitcsvm` function with a linear  
343 kernel to predict the drifting grating direction based on single-trial population responses.  
344 Similarly, a leave-one-out cross-validation technique was used, and pairwise decoding was  
345 performed between every combination of two stimulus directions.

346

### 347 **Statistics**

348 Figure data are displayed as means with standard error of the mean (SEM), unless otherwise  
349 noted. Shapiro-Wilk tests were used to assess normality, and the statistical tests performed are  
350 indicated in the text, figures, and Table 1. For multi-group and multivariate analysis (e.g.,  
351 ANOVA and Kruskal-Wallis tests) in which a significant ( $p < 0.05$ ) interaction was detected, we  
352 subsequently performed a post hoc Bonferroni-corrected test. P-values reported as 0 are too  
353 small to be accurately calculated by Matlab ( $p < 2.2e-301$ ), due to characteristically large data  
354 sets. See Table 1 for a detailed summary of statistical results and post hoc comparisons.

355

356

## 357 **Results**

358

### 359 **Sound enhances the light-evoked firing rate of a subset of V1 neurons**

360 Previous work identified that sound modulates visual responses in V1 (Ibrahim et al., 2016;  
361 Meijer et al., 2018; McClure and Polack, 2019), yet how that interaction affects stimulus  
362 encoding in individual neurons and as a population *in the awake brain* remains unclear.  
363 Furthermore, whether that interaction can be exclusively attributed to sound or to sound-induced  
364 motion is controversial (Bimbard et al., 2021). To elucidate the principles underlying audiovisual  
365 integration, we presented audiovisual stimuli to awake mice while performing extracellular  
366 recordings in V1 (Figure 1A). The visual stimulus consisted of drifting gratings in 12 directions  
367 presented at 5 visual contrast levels (Figure 1B). On half of the trials, we paired the visual  
368 stimulus with a 70 dB burst of white noise from a speaker positioned next to the screen (Figure  
369 1C), affording 10 trials of each unique audiovisual stimulus condition (Figure 1C). Twelve  
370 recording sessions across six mice were spike sorted, and the responses of these sorted  
371 neurons were organized by trial type to compare across audiovisual stimulus conditions. Figure  
372 1D-G demonstrates an example unit tuned for gratings aligned to the 30°-210° axis whose  
373 baseline and light-evoked firing rate are increased by the sound.

374

375 Sound modulated the activity of the majority of V1 neurons. We used a generalized linear model  
376 (GLM) to classify neurons as light-responsive and/or sound-responsive based on their firing rate  
377 at the onset (0-300 ms) of each trial. We chose to classify neurons based on their onset  
378 response because the first 300 ms had the highest mutual information with both the visual  
379 contrast level as well as the drifting grating orientation (Figure 2A-C). Using this classification  
380 method, we found that 86.2% (703/816) of units were responsive to increasing visual stimulus  
381 contrast levels, and of these visually responsive units, 80.1% (563/703 neurons, 12 recording  
382 sessions in 6 mice) were significantly modulated by the presence of sound (Figure 3A).



383 Because the depth electrode penetrated all layers of V1, we were able to estimate the depth of  
384 each unit based on the amplitude of the spike waveform recorded by local electrodes.  
385 Surprisingly, we found that the majority of units across each depth were either sound-  
386 responsive or sound-modulated light-responsive (Figure 3F-H). We then constructed an  
387 average PSTH from the response profiles of sound-modulated light-responsive neurons, which  
388 revealed that the largest change in light-evoked firing rate occurred at the onset of the stimulus  
389 (Figure 3B). Averaged across neurons, we found a robust increase in the magnitude of the  
390 visually evoked response across visual contrast levels (Figure 3C;  $p(\text{vis})=1.2\text{e-}100$ ,  
391  $p(\text{aud})=1.6\text{e-}88$ ,  $p(\text{interact})=5.7\text{e-}4$ , paired 2-way ANOVA;  $p_{c=0}=2.1\text{e-}51$ ,  $p_{c=0.25}=2.6\text{e-}62$ ,  
392  $p_{c=0.5}=5.7\text{e-}75$ ,  $p_{c=0.75}=1.1\text{e-}81$ ,  $p_{c=1}=2.0\text{e-}81$ , post hoc Bonferroni-corrected paired t-test, Table  
393 1). This difference was driven by the majority of neurons (95%) that increased their firing rate in  
394 the presence of sound. However, some neurons exhibited lower light-evoked and sound-evoked  
395 firing rates relative to baseline.

396  
397 This change in firing rate can be potentially supra-linear, linear or sub-linear based on whether  
398 the audiovisual response is, respectively, greater, equal or less than the sum of the unimodal  
399 light-evoked and sound-evoked firing rates. At medium to high visual contrast levels, integration  
400 of the audiovisual stimulus was predominantly supra-linear (Figure 3D-E;  $p=1.6\text{e-}12$ , Kruskal-  
401 Wallis test;  $p_{c=0.25}=0.053$ ,  $p_{c=0.5}=0.004$ ,  $p_{c=0.75}=4.6\text{e-}8$ ,  $p_{c=1}=2.1\text{e-}5$ , post hoc Bonferroni-corrected  
402 Wilcoxon signed rank test, Table 1). In summary, these results show that sound supra-linearly  
403 increases the magnitude of the light-evoked response in the majority of V1 neurons.

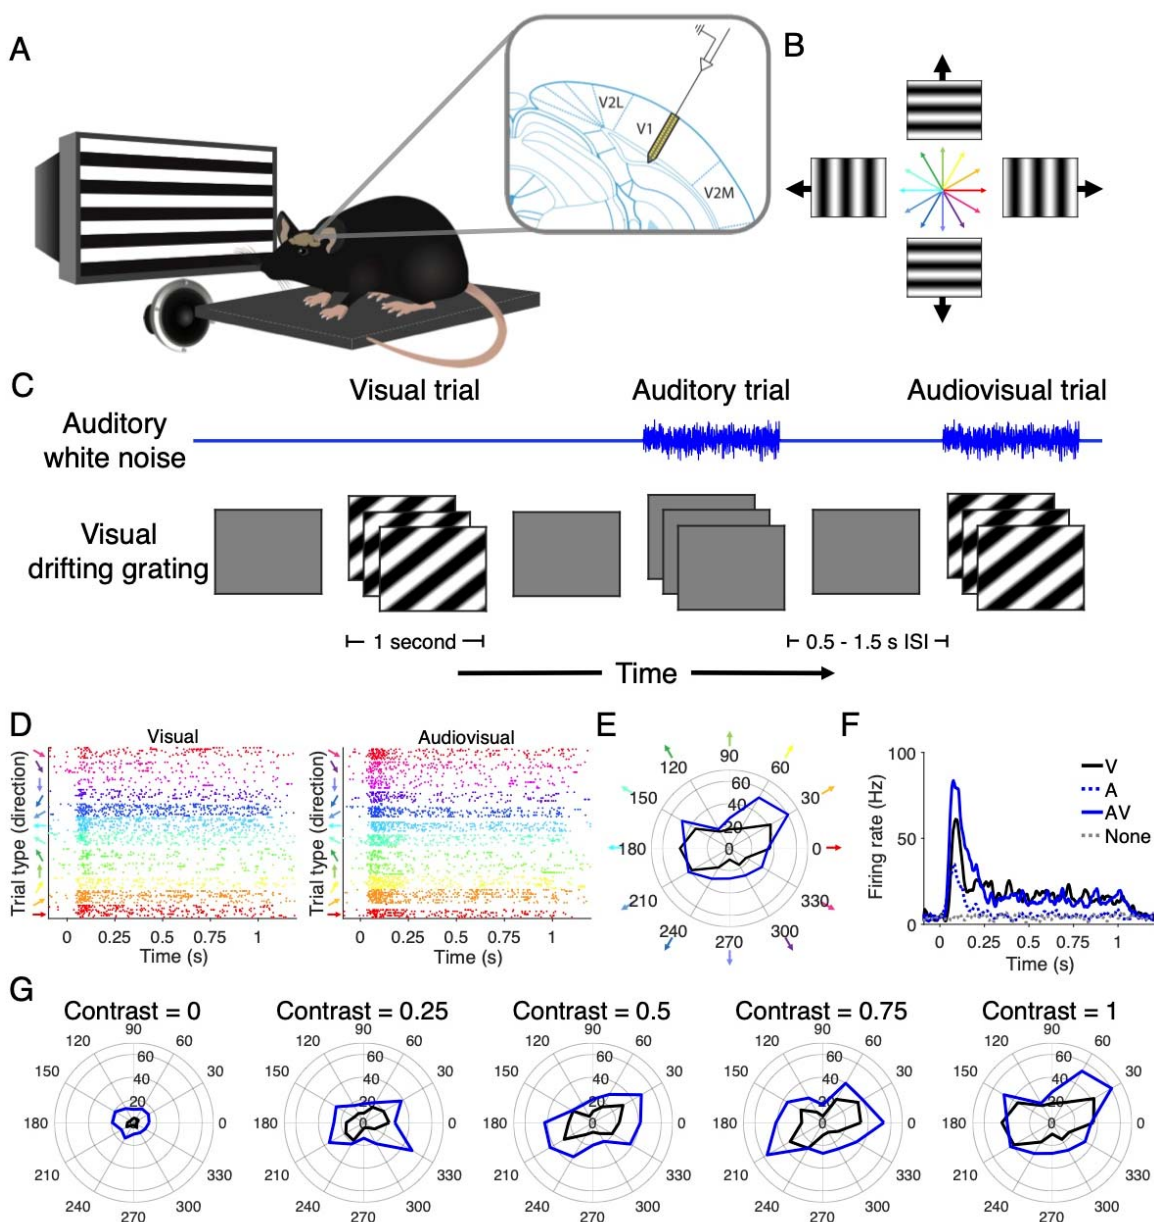

404  
 405 **Figure 1 | Audiovisual stimulus presentation** (A) Diagram (left) demonstrating that mice were head-fixed and  
 406 presented with audiovisual stimuli from the right spatial field while electrophysiological recordings were  
 407 performed in V1 (right). (B) Visual stimuli consisted of drifting gratings of 12 directions. (C) Auditory, visual, and  
 408 audiovisual trials were randomly ordered and spaced with variable inter-stimulus intervals. (D) Raster plots of  
 409 visual (left) and audiovisual (right) trials of an example neuron exhibiting visual orientation tuning. (E) Polar plot  
 410 demonstrating the orientation tuning and magnitude of response (Hz) of the same example neuron in E. (F) PSTH  
 411 of the same neuron in E demonstrating enhanced firing in response to audiovisual stimuli compared to unimodal  
 412 stimuli. (G) Example neuron in E displays enhanced firing rate with sound across visual contrast levels.  
 413

414 **Sound reduces the orientation- and direction-selectivity of tuned neurons**

415 Having observed sound-induced changes in the magnitude of the visual response, we next  
 416 assessed whether these changes in magnitude affected neuronal tuning profiles in the awake  
 417 brain. Mouse V1 neurons typically have receptive fields tuned to a specific visual stimulus  
 418 orientation and, to a lesser extent, stimulus direction (Métin et al, 1988; Rochefort et al., 2011;

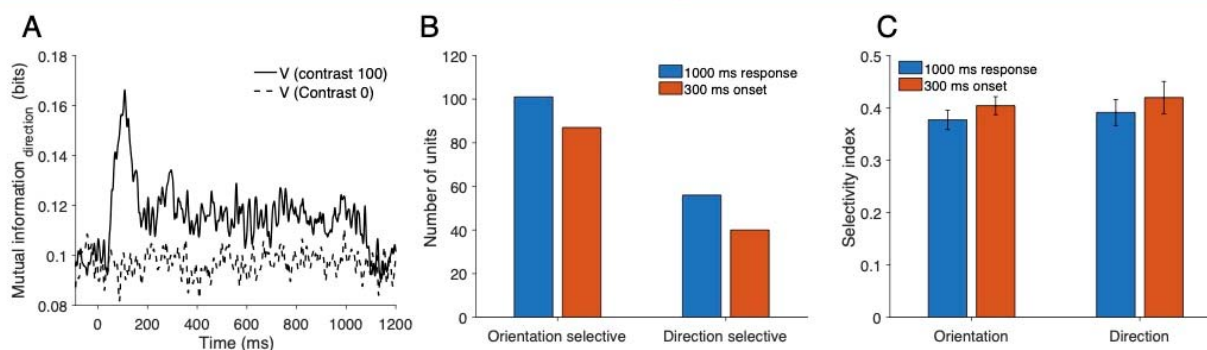

419  
420 **Figure 2 | Mutual information of neuronal responses, and depth distribution of responsive neurons** (A) Mutual  
421 information (MI) between neuronal responses and drifting grating direction, averaged across neurons. The solid  
422 line is MI at full visual contrast, and the dotted line is MI at zero visual contrast, serving as a negative control. (B)  
423 We found a slight reduction in the number of neurons classified as orientation or direction selective when based  
424 on the initial 300 ms onset response compared to the entire 1000 ms response. (C) The OSI and DSI of classified  
425 neurons was slightly higher when calculated using the initial 300 ms onset response compared to the whole 1000  
426 ms response.

427  
428 Fahey et al., 2019). We first tested whether sound altered tuning preferences of V1 neurons. In  
429 light-responsive neurons, we calculated the orientation and direction-selective indices (OSI and  
430 DSI) as well as pseudo indices based on random permutations of the trials (see Methods), and  
431 classified neurons in which the true indices were >95% of the pseudo indices as “orientation-” or  
432 “direction-selective.” Using this stringent selection criterion, we found that 13.9% (78/563) of  
433 neurons were orientation-selective, whereas 2.1% (12/563) were direction-selective. In these  
434 neurons, we determined their preferred grating orientation or direction by calculating half the  
435 complex phase of the response profile at full visual contrast (Niell and Stryker, 2008). We  
436 observed little shift in the preferred direction from the visual to audiovisual condition (Figure 3I).  
437 This shift in visual tuning preference may be due to auditory input, or it may reflect noise in the  
438 neuronal responses. To test this, we performed an additional permutation test by repeatedly  
439 sampling the visual responses. We found that the resulting distribution of preferred direction  
440 shifts resembled the observed distribution under the audiovisual condition and the observed  
441 mean shift in degrees was within the limits of the sampled distribution (Figure 3I inset).  
442 Furthermore, the observed mean shift was below the 5<sup>th</sup> percentile of the sampled distribution  
443 (Figure 3I inset). Therefore, the preferred orientation and direction of selective neurons was  
444 more reliable between the visual and audiovisual conditions than what would be predicted by  
445 neuronal noise alone.

446  
447 In addition to testing a shift in preferred direction, we investigated whether sound altered the  
448 neurons’ tuning selectivity. Tuning selectivity captures how strongly an individual neuron  
449 responds to stimuli of a certain condition as compared to others, e.g. grating orientation and drift  
450 direction (Zhao et al., 2013). We found a small reduction in the OSI from the visual to  
451 audiovisual conditions (Figure 3J;  $p=0.0018$ , paired Student’s t-test), which may reflect  
452 disproportionate changes in firing rate at the preferred versus orthogonal directions. We also  
453 found a reduction in the DSI in the presence of sound (Figure 3K;  $p=0.021$ , paired Student’s t-  
454 test). Combined, these results suggest that sound’s enhancement of the magnitude of light-  
455 evoked responses has minimal or potentially diminishing effects on the tuning selectivity of  
456 neurons.

457  
458 **Changes in neuronal response latency, onset duration, and variability in audiovisual**  
459 **compared to visual conditions**

460 Behaviorally, certain cross-modal stimuli elicit shorter reaction times than their unimodal  
 461 counterparts (Diederich and Colonius, 2004; Colonius and Diederich, 2017; Meijer et al., 2018).

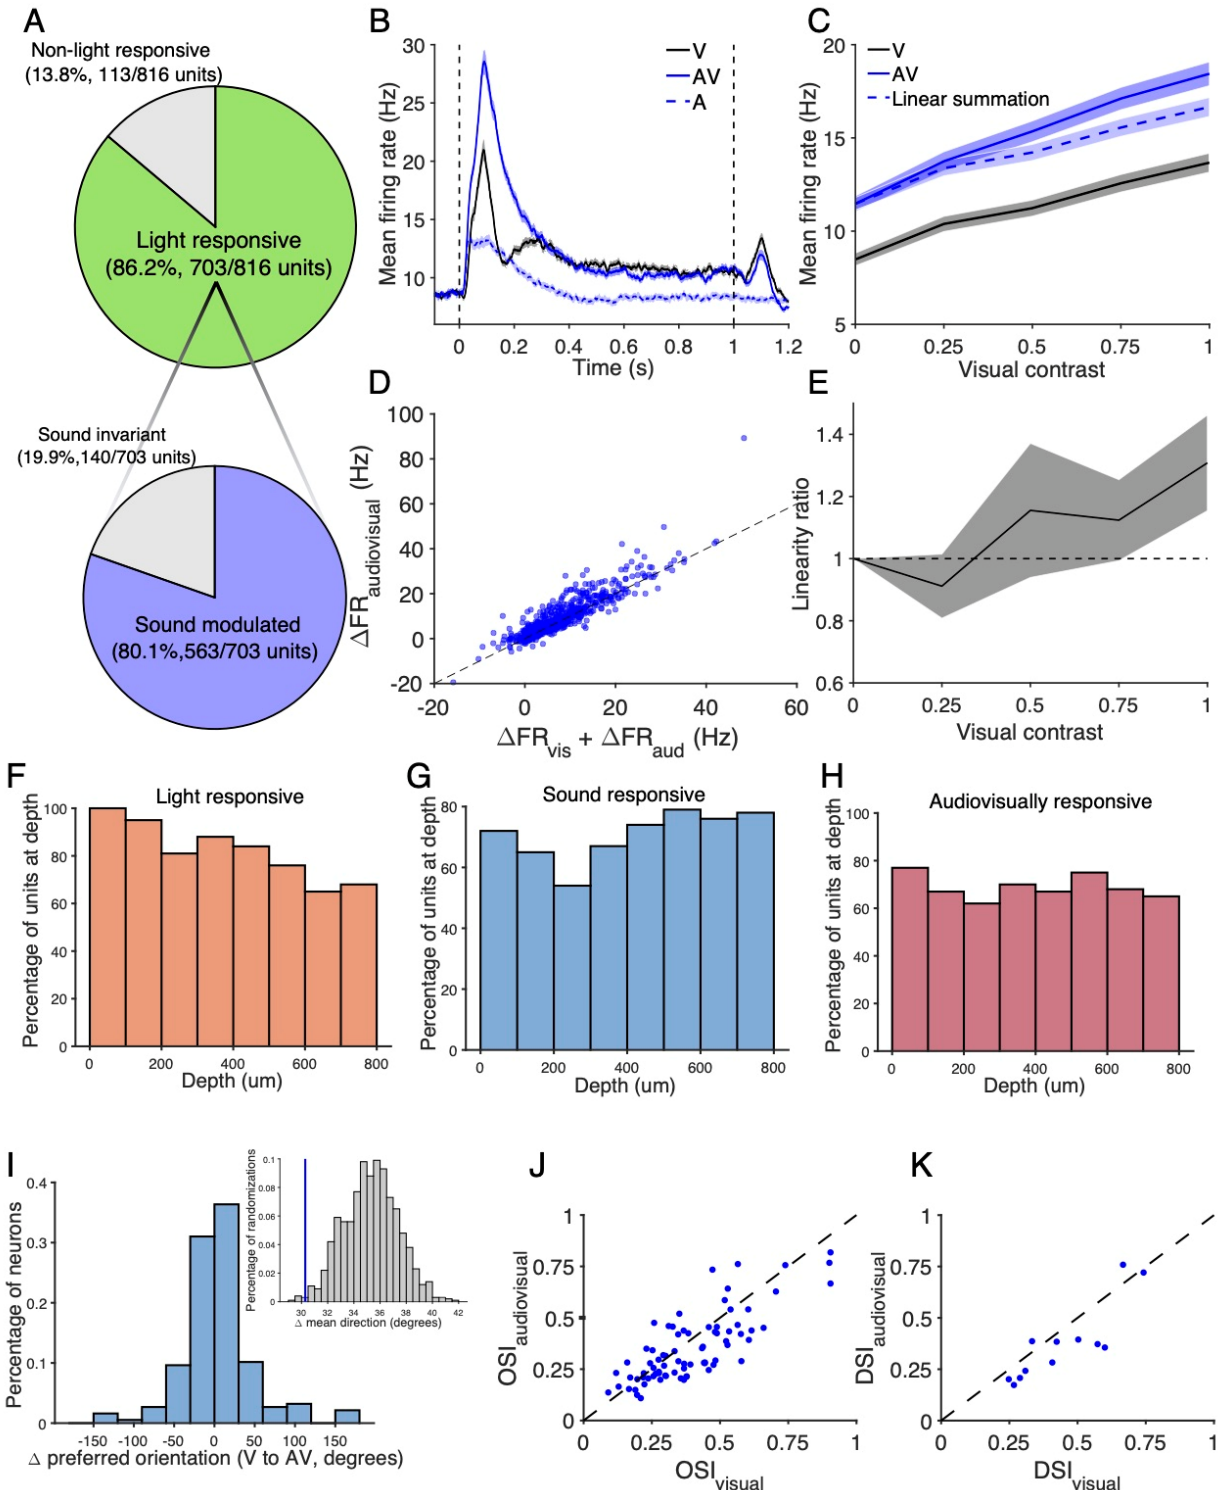

462 **Figure 3 | Sound enhances visual responses in a supra-linear manner** (A) Sound modulates visually evoked activity  
 463 in 80.1% of light-responsive neurons in V1. (B) Comparison of visual, auditory, and audiovisual PSTHs averaged  
 464 across all light-responsive sound-modulated neurons. Visual and audiovisual PSTHs correspond to the highest  
 465 visual contrast level. (C) The magnitude of audiovisual onset responses (0-300ms) is greater than that of the visual  
 466

467 response in light-responsive sound-modulated neurons ( $n=563$ ,  $p(\text{vis})=1.2\text{e-}100$ ,  $p(\text{aud})=1.6\text{e-}88$ ,  $p(\text{interact})=5.7\text{e-}$   
468  $4$ , 2-way repeated measures ANOVA; post hoc Bonferroni-corrected paired t-test). The expected linear sum of the  
469 unimodal auditory and visual responses is included. (D) At full visual contrast, the observed audiovisual response in  
470 the majority of neurons is greater than the linear sum of the unimodal auditory and visual responses. (E) A linearity  
471 ratio above 1 demonstrates audiovisual responses in V1 represent supra-linear integration of the unimodal signals  
472 ( $n=563$ ,  $p=1.6\text{e-}12$ , Kruskal-Wallis test, post hoc Bonferroni-corrected Wilcoxon signed rank test). (F-H) Histograms  
473 demonstrating the percentage of neurons at each 100  $\mu\text{m}$  depth bin that were classified as light, sound, and  
474 audiovisually responsive, based on the recording electrode with the largest spike waveform amplitude. (I)  
475 Histogram depicting changes in preferred drifting grating directions, calculated using half of the complex phase,  
476 with sound in orientation-selective neuron. In the inset, the observed mean change in preferred direction (blue) is  
477 within the expected distribution (gray) based on shuffled permutations using the visual response variability. (J) A  
478 slight reduction in the orientation selectivity index was observed in orientation-selective neurons ( $n=78$ ,  $p=0.0018$ ,  
479 paired t-test). (K) A slight reduction in the direction selectivity index was also observed in direction-selective  
480 neurons ( $n=12$ ,  $p=0.021$ , paired t-test).

481  
482 Therefore, we hypothesized that sound reduces the latency of the light-evoked response at a  
483 neuronal level as well. For each neuron, we calculated the response latency as the first time bin  
484 after stimulus onset at which the firing rate exceeded 1 standard deviation above baseline  
485 (Figure 4A), and found that sound reduced the response latency across contrast levels (Figure  
486 4B;  $p(\text{vis})=6.9\text{e-}4$ ,  $p(\text{aud})=6.8\text{e-}15$ ,  $p(\text{interact})=0.045$ , paired 2-way ANOVA;  $p_{c=0.25}=2.3\text{e-}4$ ,  
487  $p_{c=0.5}=7.1\text{e-}12$ ,  $p_{c=0.75}=4.6\text{e-}5$ ,  $p_{c=1}=9.9\text{e-}4$ , post hoc Bonferroni-corrected paired t-test, Table 1).  
488 We additionally calculated the slope of the onset response of light-responsive sound-modulated  
489 neurons, measured from trial onset until the time at which each neuron achieved its peak firing  
490 rate (Figure 4C). We found that sound increased the slope of the onset response (Figure 4D;  
491  $p(\text{vis})=3.5\text{e-}121$ ,  $p(\text{aud})=2.7\text{e-}15$ ,  $p(\text{interact})=0.038$ , paired 2-way ANOVA;  $p_{c=0.25}=1.4\text{e-}4$ ,  
492  $p_{c=0.5}=8.9\text{e-}13$ ,  $p_{c=0.75}=3.6\text{e-}12$ ,  $p_{c=1}=5.5\text{e-}8$ , post hoc Bonferroni-corrected paired t-test, Table 1),  
493 both indicating that the response latency was reduced in the audiovisual condition compared to  
494 the visual condition. Additionally, the duration of the light-evoked response, defined as the full  
495 width at half maximum of the peak onset firing rate, increased in the presence of sound (Figure  
496 4E,F;  $p(\text{vis})=1.3\text{e-}10$ ,  $p(\text{aud})=8.7\text{e-}98$ ,  $p(\text{interact})=0.23$ , paired 2-way ANOVA). Both of these  
497 timing effects were preserved across contrast levels. Therefore, the latency and onset duration  
498 of audiovisual responses of V1 neurons is enhanced compared to visual responses.

499  
500 Having observed changes in response magnitude and timing, we next investigated the effect of  
501 sound on the variability of light-evoked responses. If individual neurons encode the visual  
502 stimulus using changes in their firing rate, a more consistent response would entail less spread  
503 in the response magnitude relative to the mean response across trials of a single stimulus type.  
504 We quantified this relationship using the coefficient of variation (CV) defined as the ratio of the  
505 standard deviation to the response mean (Gur et al., 1997). We hypothesized that sound  
506 reduces the CV of light-evoked responses, corresponding to reduced response variability and  
507 higher signal-to-noise ratio. Figure 4G depicts the relationship between response magnitude  
508 and CV in an example sound-modulated light-responsive neuron, demonstrating that increased  
509 response magnitude correlates with reduced CV. Consistent with sound increasing the visual  
510 response magnitude in the majority of sound-modulated light-responsive neurons (Figure 4), we  
511 observed a reduction of CV in the audiovisual condition relative to the visual condition when  
512 averaged across these neurons (Figure 4H;  $p(\text{vis})=0.28$ ,  $p(\text{aud})=4.2\text{e-}103$ ,  $p(\text{interact})=0.38$ ,  
513 paired 2-way ANOVA). Taken together, these results indicate that sound not only modulates the  
514 magnitude of the visual response (Figure 4), but also improves the timing and consistency of  
515 individual neurons' responses (Figure 4).

516  
517 **Sound-induced movement does not account for sound's effect on visual responses**



518 It is known that whisking and locomotive behaviors modulate neuronal activity in mouse visual  
 519 cortex (Niell and Stryker, 2010) and auditory cortex (Nelson et al., 2013; Schneider and  
 520 Mooney,

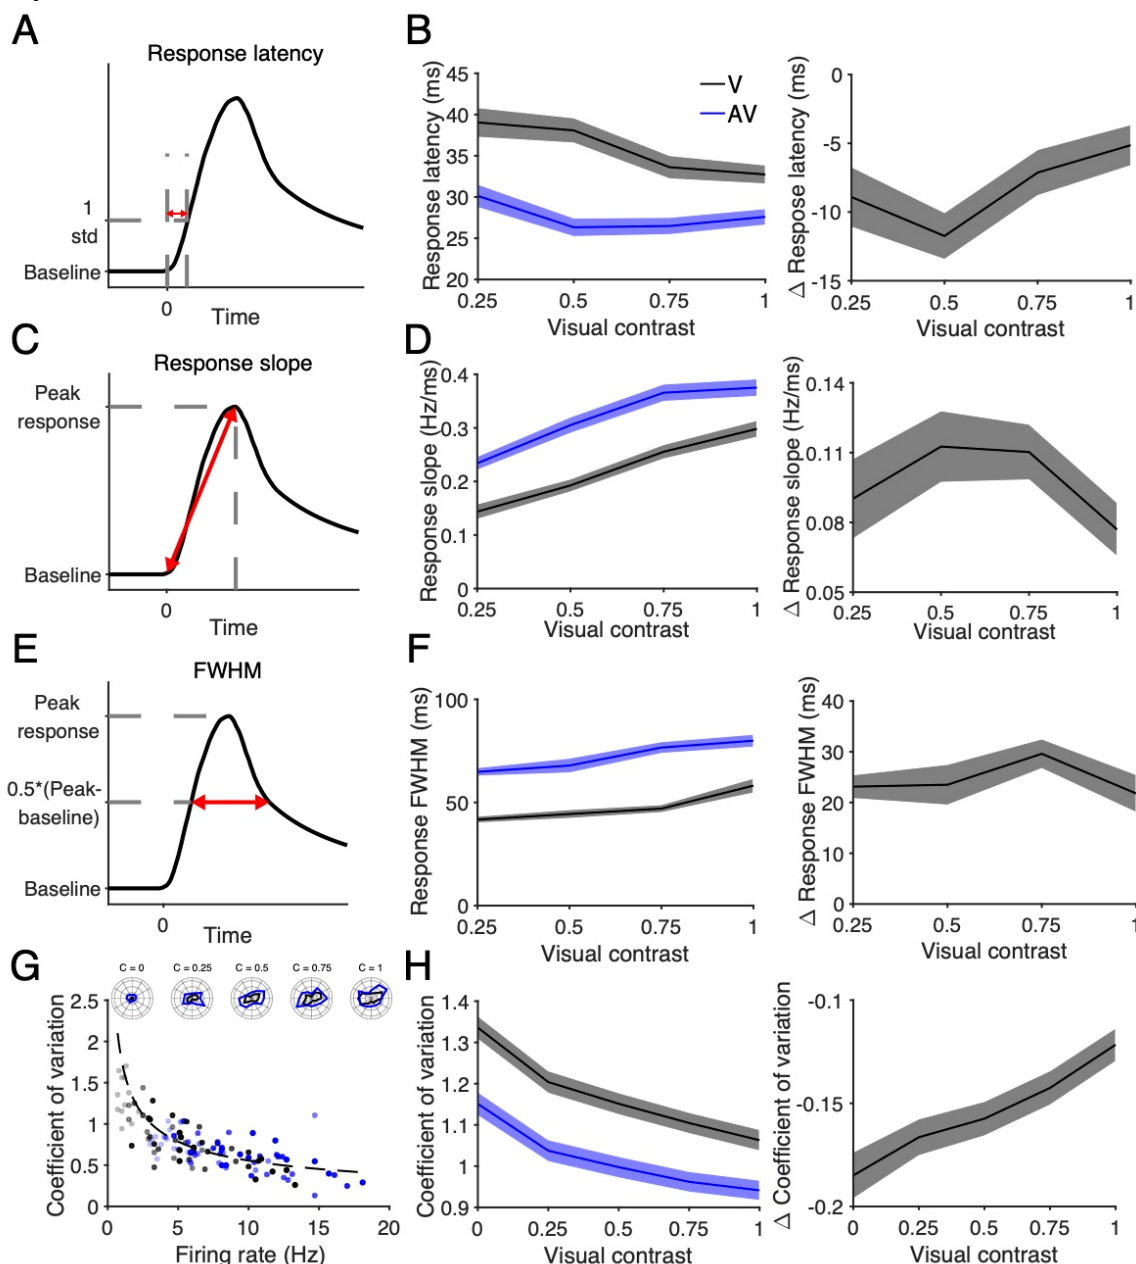

521  
 522 **Figure 4 | Changes in neuronal response latency, onset duration, and variability in audiovisual compared to**  
 523 **visual conditions** (A) Diagram of the calculation of response latency, the first time bin in which the FR exceeds 1  
 524 std above baseline. (B) Audiovisual response latency is less than that of the visual response (left: absolute, right:  
 525 difference;  $p(\text{vis})=6.9\text{e-}4$ ,  $p(\text{aud})=6.8\text{e-}15$ ,  $p(\text{interact})=0.045$ , paired 2-way ANOVA, post hoc Bonferroni-corrected  
 526 paired t-test, Table 1). (C) Diagram of the calculation of response onset slope, the peak change in FR over the  
 527 latency to peak response. (D) The slope of the audiovisual response is greater than that of the visual response  
 528 (left: absolute, right: difference;  $n=563$ ,  $p(\text{vis})=3.5\text{e-}121$ ,  $p(\text{aud})=2.7\text{e-}15$ ,  $p(\text{interact})=0.038$ , paired 2-way ANOVA,  
 529 post hoc Bonferroni-corrected paired t-test). (E) Diagram of the calculation of FWHM, the width of the onset  
 530 response at half maximum FR. (F) The FWHM of the audiovisual response is greater than that of the visual  
 531 response (left: absolute, right: difference;  $n=367$ ,  $p(\text{vis})=1.3\text{e-}10$ ,  $p(\text{aud})=8.7\text{e-}98$ ,  $p(\text{interact})=0.23$  paired 2-way

532 ANOVA). (G) An example neuron demonstrating that increased response magnitude corresponds to lower CV  
533 according to an inverse square root relationship. The black and blue dots represent visual and audiovisual  
534 responses, respectively, and the dot transparency corresponds to visual contrast level. The dotted lines are fitted  
535  $y=c/\sqrt{x}$  curves, where  $c$  is a constant. The above inset is the polar plots corresponding to the example neuron.  
536 (H) Lower coefficient of variation indicates reduced response variability in audiovisual compared to visual  
537 responses (left: absolute, right: difference;  $n=563$ ,  $p(\text{vis})=0.28$ ,  $p(\text{aud})=4.2e-103$ ,  $p(\text{interact})=0.38$ , paired 2-way  
538 ANOVA).

539  
540 2018; Bigelow et al., 2019). Therefore, having established that sound robustly modulates visual  
541 responses (Figure 3), we tested whether and to what extent these observed changes were more  
542 accurately attributable to sound-induced movement. In an additional cohort of mice, we  
543 performed V1 extracellular recordings with the same audiovisual stimuli described above while  
544 recording movement activity of the mice throughout stimulus presentation. Movement was  
545 calculated as frame-by-frame difference in video pixels, an approach that captured both  
546 locomotive and subtle whisking behavior. Despite being head-fixed to afford stable  
547 electrophysiological recordings, the mice were positioned on a smooth stage that freely allowed  
548 volitional locomotion. We found that both visual and auditory stimuli did evoke whisking and  
549 locomotive behavior in mice (Figure 5A). We first compared this movement during the stimulus  
550 trial to the 100ms baseline prior to trial onset and found that movement was higher during  
551 audiovisual trials compared to visual trials (Figure 5B;  $p=9.1e-5$ , paired t-test). However, there  
552 were many visual trials in which substantial movement occurred, as well as audiovisual trials in  
553 which little movement was detected (Figure 5C). Because of this large variability in sound-  
554 induced movement, we were able to control for movement when comparing visual and  
555 audiovisual activity in the recorded neurons.

556  
557 We used a GLM to classify each neuron as light-, sound-, and/or motion-responsive based on  
558 the neuron's firing rate and mouse's movement activity during the onset (0-300ms) of the trial.  
559 The vast majority of light-responsive neurons, 71.1% (249/350), displayed both sound- and  
560 motion-modulated visual responses (Figure 5D). 11.1% (39/350) and 5.2% (18/350) of light-  
561 responsive neurons were purely sound- or motion-modulated, respectively. An additional 12.6%  
562 (44/350) were invariant to sound or motion. We then compared the visually and audiovisually  
563 evoked firing rates of neurons when controlling for movement. Among sound- and motion-  
564 modulated light-responsive neurons, the firing rate was higher on audiovisual trials than visual  
565 trials when movement was held constant (Figure 5E), especially when mice showed limited  
566 movement. On trials in which the mice were largely stationary ( $z\text{-score}<-0.5$ , 43% of visual trials,  
567 32% of audiovisual trials) or displayed moderate levels of movement ( $-0.5<z\text{-score}<1.5$ , 51% of  
568 visual trials, 57% of audiovisual trials), the mean firing rate of neurons was 54-62% higher when  
569 sound was presented than when sound was absent. The firing rates under the two stimulus  
570 conditions converged on trials in which the mice displayed high movement activity ( $z\text{-score}>1.5$ ,  
571 4.8% of visual trials, 11% of audiovisual trials; Figure 5E,F;  $p(\text{move})=0.010$ ,  $p(\text{aud})=1.4e-13$ ,  
572  $p(\text{interact})=1.8e-8$ , unbalanced 2-way ANOVA;  $p_{\text{stationary}}=1.5e-14$ ,  $p_{\text{low motion}}=7.1e-10$ ,  $p_{\text{high}}$   
573  $p_{\text{motion}}=0.6$ , post hoc Bonferroni-corrected two-sample t-test, Table 1). Notably, increasing  
574 movement activity was correlated with increased firing rates on visual trials, but was correlated  
575 with decreasing firing rates among audiovisual trials (Figure 5F). These results indicate that  
576 sound modulated visually evoked neuronal activity even when accounting for sound-induced  
577 movement in awake mice, with the exception of when mice showed the highest amount of  
578 movement, during which there was little effect of sound on firing rates.

### 579 580 **Sound and movement have distinct and complementary effects on visual responses**

581 To further parse out the role of sound and movement on audiovisual responses, we used a  
582 separate GLM to capture the time course of these parameters' effects on visually evoked

583 activity. For each neuron, we used a GLM with a sliding 10ms window to reconstruct the PSTH  
 584 based on the visual contrast level, sound presence, and movement during that time window  
 585 (Figure 6A). Figure 6B shows an example neuron in which the GLM accurately captures the  
 586 light-evoked, sound-evoked, and audiovisually evoked PSTHs using the average movement for  
 587 each trial type. Across neurons, the GLM-estimated PSTHs accurately reconstructed observed  
 588 PSTHs, with the

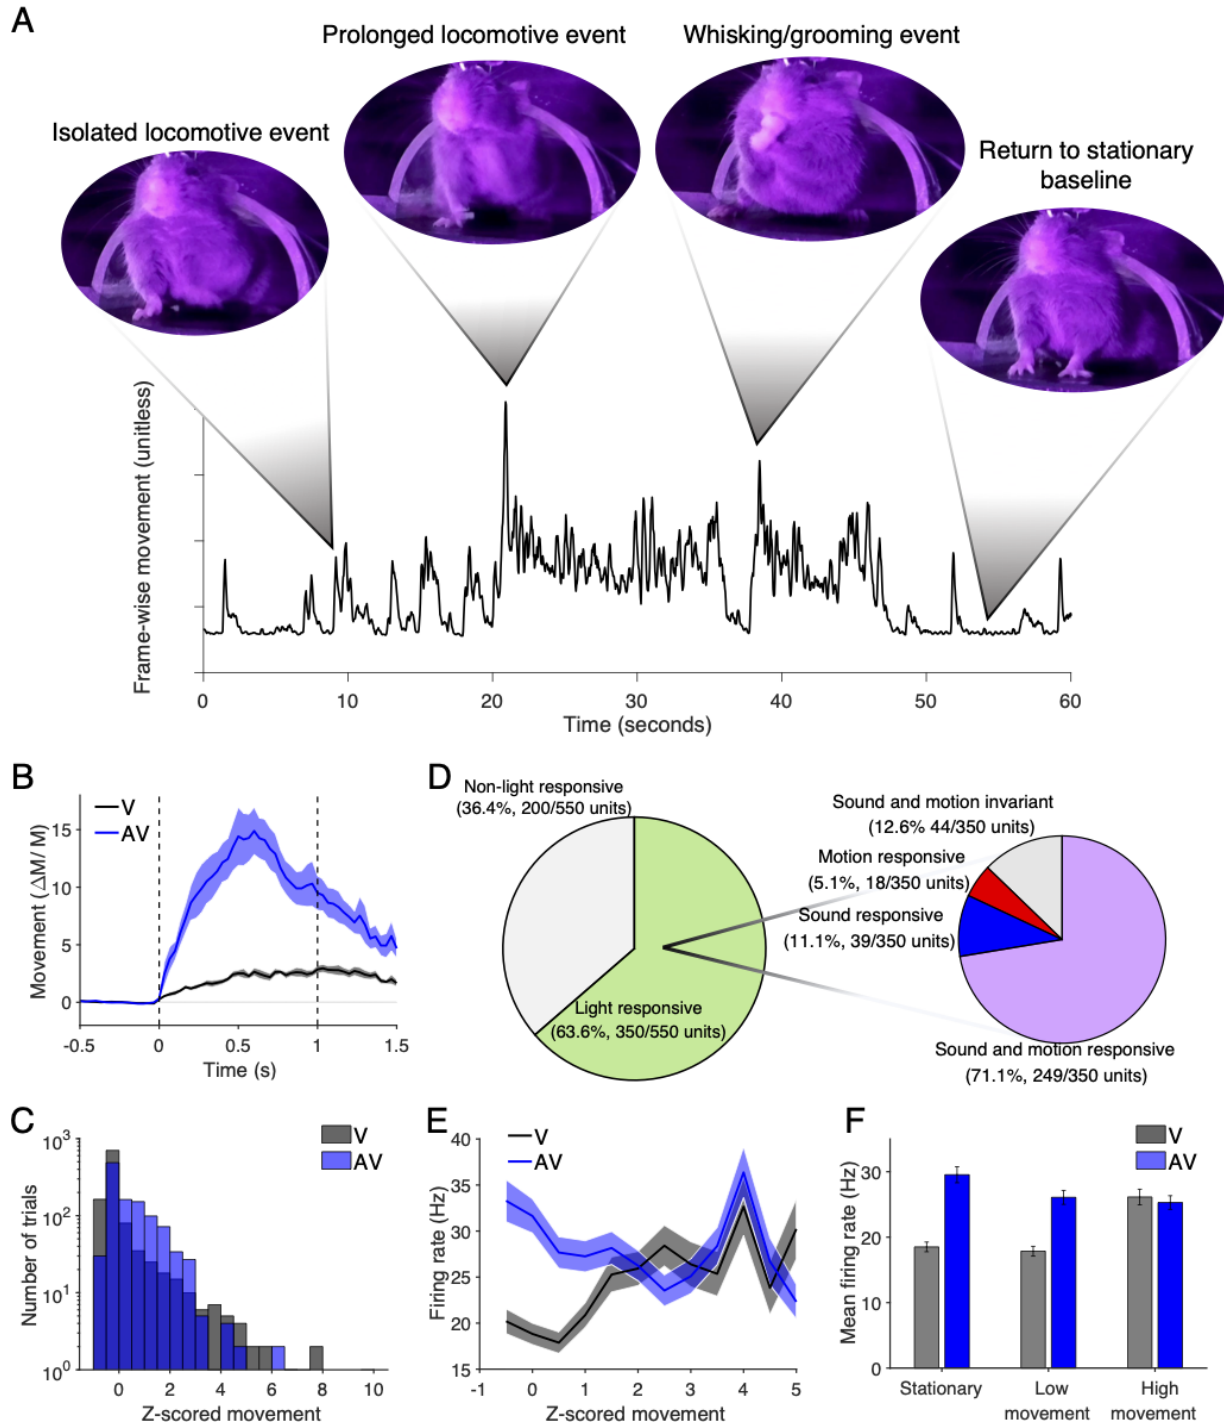

589 **Figure 5 | Sound modulates visual activity when controlling for stimulus-induced movement** (A) Sample trace  
 590 from example video recording demonstrating the detection and quantification of locomotive and whisking events  
 591

592 during electrophysiological recordings. (B) Mice displayed more movement response to audiovisual trials than in  
593 visual trials ( $n=9$  recording sessions;  $p=9.1e-5$ , paired t-test). (C) Histogram of trials' z-scored movements show a  
594 range of levels of movement during both visual and audiovisual trials. (D) Venn diagram demonstrating that 87% of  
595 light-responsive neurons exhibited some combination of sound- and movement-responsiveness. (E) Comparison of  
596 firing rate of sound- and motion-modulated light-responsive neurons across trials with a range of z-scored  
597 movement. (F) Responses to audiovisual stimuli evoke larger magnitude responses than visual stimuli when mice  
598 were stationary ( $z\text{-score}<-0.5$ ) or displayed low to moderate movement ( $-0.5<z\text{-score}<1.5$ ), but responses were not  
599 significantly different when mice displayed the highest amount of movement ( $z\text{-score}>1.5$ ;  $p(\text{motion})=0.001$ ,  
600  $p(\text{aud})=1.4e-13$ ,  $p(\text{interact})=1.8e-8$ , 2-way ANOVA, post hoc Bonferroni-corrected two-sample t-test)

601  
602 highest correlation when all parameters were included in the estimate (Figure 6C-E). We  
603 leveraged the coefficients fit to each neuron (Figure 6A) to estimate the unique contribution of  
604 each predictor to the firing rates as a function of time (see Materials and Methods). In the  
605 absence of movement, sound predominantly enhanced neuronal activity at the onset of the  
606 visual response and suppressed activity during the response's sustained period (Figure 6F;  
607  $n=295$  fitted neurons, paired t-test at each time window [1391],  $\alpha=3.6e-5$ ). Conversely,  
608 movement had little effect on the onset activity in the absence of sound, but rather enhanced  
609 firing rates during the response's sustained period (Figure 6G;  $n=295$  fitted neurons, paired t-  
610 test at each time window [1391],  $\alpha=3.6e-5$ ). Together, sound and movement had  
611 complementary effects in which both the onset and sustained portions of the visual response  
612 were enhanced (Figure 6H;  $n=295$  fitted neurons, paired t-test at each time window [1391],  
613  $\alpha=3.6e-5$ ). Again notably, the peak onset response under the audiovisual condition was lower  
614 when movement was included in the estimate (Figure 6H). These findings indicate not only that  
615 movement is unable to account for the changes in onset response reported above, but also that  
616 sound and motion have distinct and complementary effects on the time course of visually  
617 evoked activity in V1.

### 618 **Decoding of the visual stimulus from individual neurons is improved with sound**

620 Behaviorally, sound can improve the detection and discriminability of visual responses, however  
621 whether that improved visual acuity is reflected in V1 audiovisual responses is unknown.  
622 Despite many studies reporting how sound affects visual responses in V1, whether these  
623 changes result in improved neuronal encoding of the visual stimulus, especially in the awake  
624 brain, has yet to be directly demonstrated. The increase in response magnitude and decrease in  
625 CV suggest that sound may improve visual stimulus discriminability in individual V1 neurons.  
626 Consistent with these changes in response magnitude and variability, we observed sound-  
627 induced improvements in the  $d'$  sensitivity index between responses to low contrast drifting  
628 grating directions among orientation- and direction-selective neurons (Figure 7A,B), further  
629 indicating improved orientation and directional discriminability in individual neurons. To directly  
630 test this hypothesis, we used the neuronal responses of individual neurons to estimate the  
631 visual stimulus drifting grating orientation and direction. We trained a maximum likelihood  
632 estimate (MLE)-based decoder (Montijn et al., 2014; Meijer et al., 2017) on trials from the  
633 preferred and orthogonal orientations in orientation-selective neurons and on trials from the  
634 preferred and anti-preferred directions in direction-selective neurons. We used leave-one-out  
635 cross-validation and cycled the probe trial through the repeated trials of the stimulus condition in  
636 order to calculate the mean decoding performance. The MLE decoder's output was the  
637 orientation or direction with the maximum posterior likelihood based on the training data (Figure  
638 7C). This decoding technique achieves high decoding accuracy (Figure 7D). When averaged  
639 across sound-modulated orientation-selective neurons, decoding performance was improved on  
640 audiovisual trials compared to visual trials (Figure 7E;  $p(\text{vis})=4.8e-112$ ,  $p(\text{aud})=7.8e-4$ ,  
641  $p(\text{interact})=0.71$ , paired 2-way ANOVA), with the greatest improvements at low to intermediate  
642 contrast levels (Figure 7F). We applied this approach to sound-modulated direction-selective

643 units and found similar trends towards improvements at low contrast levels (Figure 7F,H;  
644  $p(\text{vis})=2.1\text{e-}4$ ,  $p(\text{aud})=0.18$ ,  $p(\text{interact})=0.78$ , paired 2-way ANOVA), limited by fewer and  
645 weaker direction-selective neurons in V1. These results demonstrate that sound-induced  
646 changes in response magnitude and consistency interact in order to improve neuronal  
647 representation of the visual stimulus in individual neurons.

648

649

650



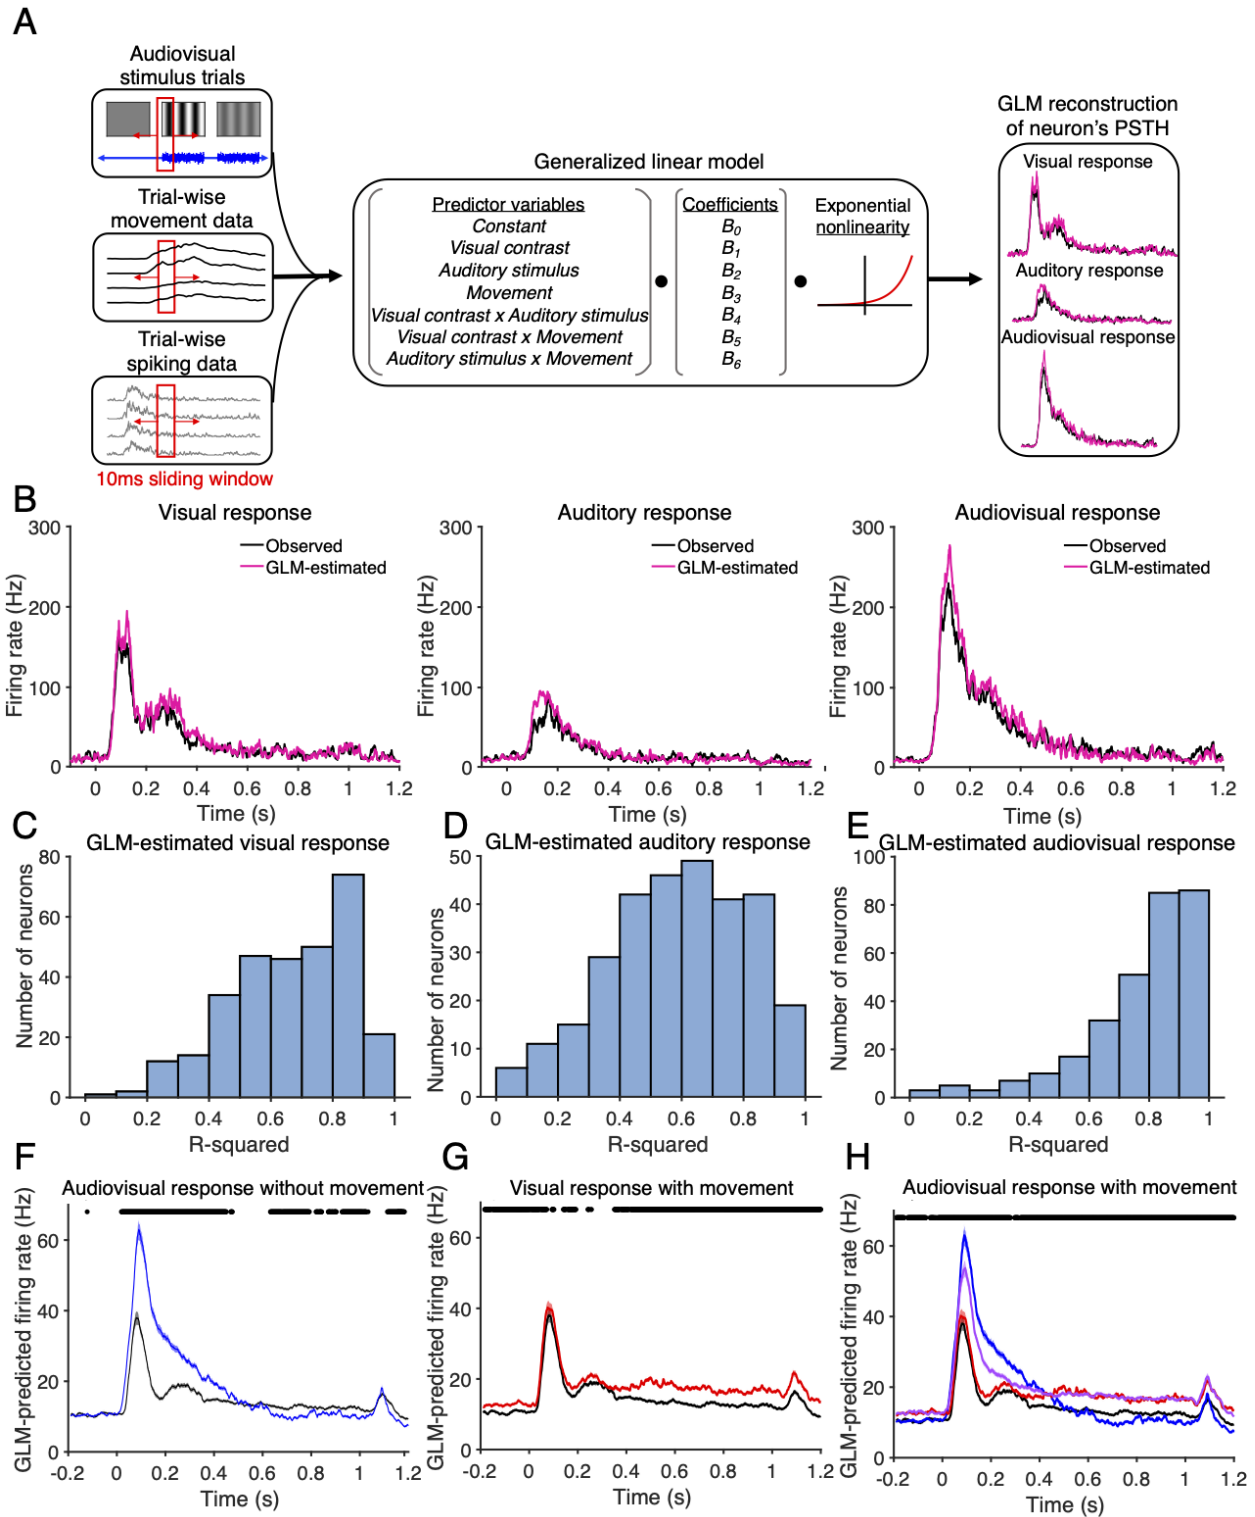

651  
 652 **Figure 6 | Sound and movement modulate visual responses in distinct but complementary ways** (A) Diagram  
 653 illustrating the use of a GLM to reconstruct individual neurons' PSTHs based on neuronal responses and mouse  
 654 movement during stimulus presentation. The GLM was then used to predict the time course of neuronal responses  
 655 audiovisual stimuli with and without movement. (B) Observed trial-averaged PSTHs for visual-only (left), auditory-  
 656 only (middle), and audiovisual (right) trials overlaid with GLM estimates based on the selected stimulus features.  
 657 (C-E) Histograms demonstrating  $R^2$  values of the GLM-estimated PSTHs, averaged across sound- and motion-

658 modulated light-responsive neurons. Moderate to high  $R^2$  values across the population indicate a good ability for  
659 the GLM to estimate neuronal firing rates. (F-H) GLM-predicted visually evoked PSTHs with and without sound and  
660 motion. Asterisks indicate time windows in which there was a significant difference between the *light* prediction  
661 and the *light+sound*, *light+motion*, and *light+sound+motion* predictions, respectively. (F) Excluding motion  
662 highlights that sound primarily enhances the onset response. Asterisks indicate time windows in which there was a  
663 significant difference (n=295 fitted neurons; paired t-test,  $\alpha=3.6e-5$ ). (G) Excluding sound highlights that motion  
664 primarily enhances the sustained portion of the response. Asterisks indicate time windows in which there was a  
665 significant difference (n=295 fitted neurons; paired t-test,  $\alpha=3.6e-5$ ). (H) Sound and motion together enhance both  
666 the onset and sustained periods of the visually evoked response. (n=295 fitted neurons; paired t-test,  $\alpha=3.6e-5$ ).  
667

### 668 **Population-based decoding of the visual stimulus improves with sound**

669 V1 uses population coding to relay information about the various stimulus dimensions to  
670 downstream visual areas (Montijn et al., 2014, Berens et al., 2012), so we next tested whether  
671 these improvements in visual stimulus encoding in individual neurons extended to the  
672 population level. We began by training a support vector machine (SVM) to perform pairwise  
673 classification of visual drifting grating directions based on neuronal population activity. We again  
674 used a leave-one-out cross-validation approach when training and testing the SVM (Figure 8A).  
675 Unsurprisingly, decoding accuracy improved as more neurons were included in the population  
676 (Figure 8B), achieving an accuracy of ~90% when averaged across all pairwise orientation  
677 comparisons. At full visual contrast, there was little difference between the performance on  
678 visual and audiovisual trials.  
679

680 However, at low to intermediate visual contrast levels, classification performance robustly  
681 increased on audiovisual trials as compared to visual trials (Figure 8D). This improvement in  
682 performance was greatest when comparing orthogonal drifting grating orientations (Figure 8E;  
683  $p(\text{vis})=1.8e-61$ ,  $p(\text{aud})=1.9e-8$ ,  $p(\text{interact}) = 2.4e-4$ , 2-way ANOVA;  $p_{c=0}=0.12$ ,  $p_{c=0.25}=0.0016$ ,  
684  $p_{c=0.5}=0.0014$ ,  $p_{c=0.75}=0.0023$ ;  $p_{c=1}=1$ , post hoc Bonferroni-corrected paired t-test, Table 1). A  
685 similar improvement was also observed in decoding opposite drifting grating directions (Figure  
686 8F,  $p(\text{vis})=1.1e-21$ ,  $p(\text{aud})=9.0e-9$ ,  $p(\text{interact})=0.0019$ , 2-way ANOVA;  $p_{c=0}=0.55$ ,  $p_{c=0.25}=5.3e-5$ ,  
687  $p_{c=0.5}=0.0036$ ,  $p_{c=0.75}=0.17$ ,  $p_{c=1}=0.0036$ , post hoc Bonferroni-corrected paired t-test, Table 1).  
688 These results indicate that sound improves neuronal population encoding of grating orientation  
689 and drift direction.  
690

691 Similar performance levels were also observed when decoding drifting grating orientation and  
692 direction using an MLE-based population decoder, indicating that the results were not specific to  
693 the decoding algorithm. Again, performance improved with increasing population sizes (Figure  
694 8C), and accuracy was higher on audiovisual trials than visual trials (Figure 8G-I; orientation:  
695  $p(\text{vis})=2.3e-66$ ,  $p(\text{aud})=0.61$ ,  $p(\text{interact})=9.6e-11$ , 2-way ANOVA;  $p_{c=0}=5.8e-4$ ,  $p_{c=0.25}=1.8e-4$ ,  
696  $p_{c=0.5}=0.3$ ,  $p_{c=0.75}=0.53$ ,  $p_{c=1}=0.15$ , post hoc Bonferroni-corrected paired t-test, Table 1; direction:  
697  $p(\text{vis})=4.6e-26$ ,  $p(\text{aud})=0.51$ ,  $p(\text{interact})=4.1e-6$ , 2-way ANOVA;  $p_{c=0}=0.037$ ,  $p_{c=0.25}=6.4e-6$ ,  
698  $p_{c=0.5}=0.036$ ,  $p_{c=0.75}=0.16$ ,  $p_{c=1}=0.14$ , post hoc Bonferroni-corrected paired t-test, Table 1).  
699

700 Expanding on the SVM approach, the MLE-based decoder allowed us to perform not only  
701 pairwise classification, but also classification of 1 out of all 12 drifting grating directions. When  
702 trained and tested in this fashion, MLE decoding performance again improved at low to  
703 intermediate contrast levels on audiovisual trials (Figure 8J-L), before reaching asymptotic  
704 performance of ~45% at full visual contrast (Figure 8L;  $p(\text{vis})=2.2e-92$ ,  $p(\text{aud})=1.9e-5$ ,  
705  $p(\text{interact})=2.7e-11$ , 2-way ANOVA;  $p_{c=0}=0.012$ ,  $p_{c=0.25}=1.4e-10$ ,  $p_{c=0.5}=0.48$ ,  $p_{c=0.75}=0.0013$ ,  
706  $p_{c=1}=0.5$ , post hoc Bonferroni-corrected paired t-test, Table 1). Similar results were found when  
707 organizing the neurons by recording session instead of pooling all neurons together (data not  
708 shown). Taken together, these results

709

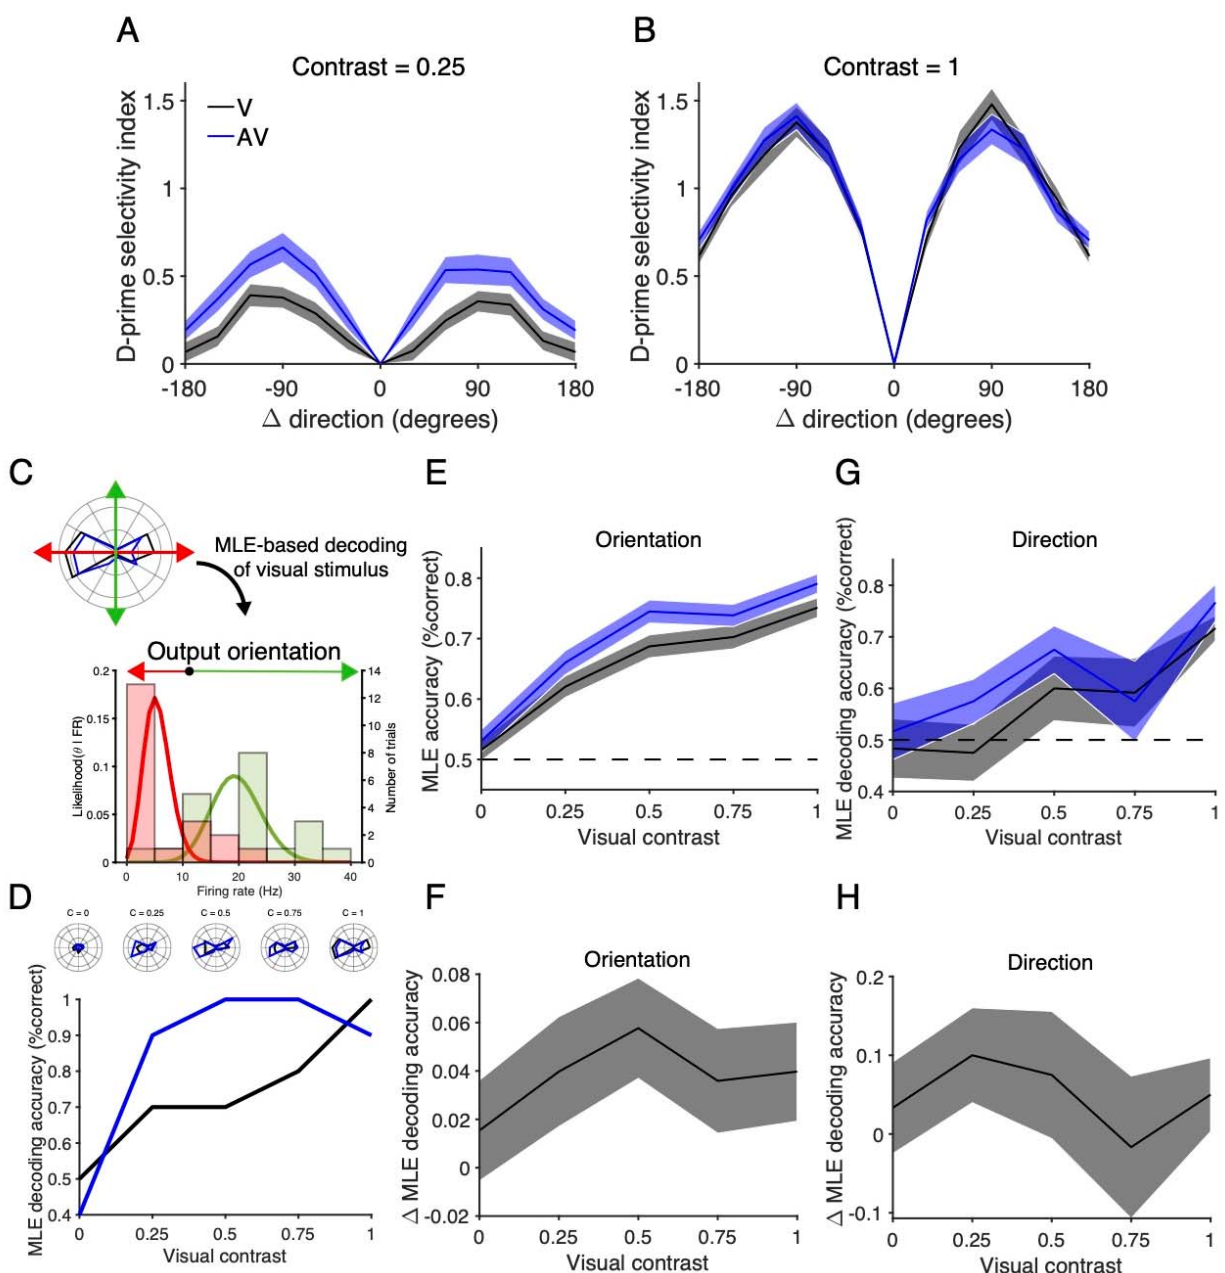

710  
 711 **Figure 7 | Sound improves decoding of drifting grating direction and orientation in individual neurons (A-B)** The  
 712 *d'* sensitivity index between neuronal responses to drifting grating directions, averaged across orientation- and  
 713 direction-selective neurons. Enhancements are observed at low visual contrast (A), whereas minimal changes are  
 714 present at full contrast (B). (C) Diagram illustrating MLE-based decoding of an individual neuron's preferred versus  
 715 orthogonal orientations. (D) Performance of the MLE decoder, trained on an example orientation-selective neuron,  
 716 in decoding the neuron's preferred versus orthogonal orientations. The neuron's polar plots are shown in the  
 717 above inset. (E-F) Absolute (E) and difference (F) in decoding accuracy of preferred versus orthogonal orientations,  
 718 averaged across sound-modulated orientation-selective neurons, demonstrating higher performance in the  
 719 audiovisual condition ( $n=78$ ,  $p(\text{vis})=4.8e-112$ ,  $p(\text{aud})=7.8e-4$ ,  $p(\text{interact})=0.71$ , paired 2-way ANOVA). (G-H)  
 720 Absolute (G) and difference (H) in decoding accuracy of preferred versus anti-preferred directions, averaged across  
 721 sound-modulated direction-selective neurons. No significant effect of sound on decoding accuracy was observed  
 722 ( $n=12$ ,  $p(\text{vis})=2.1e-4$ ,  $p(\text{aud})=0.18$ ,  $p(\text{interact})=0.78$ , paired 2-way ANOVA).

723

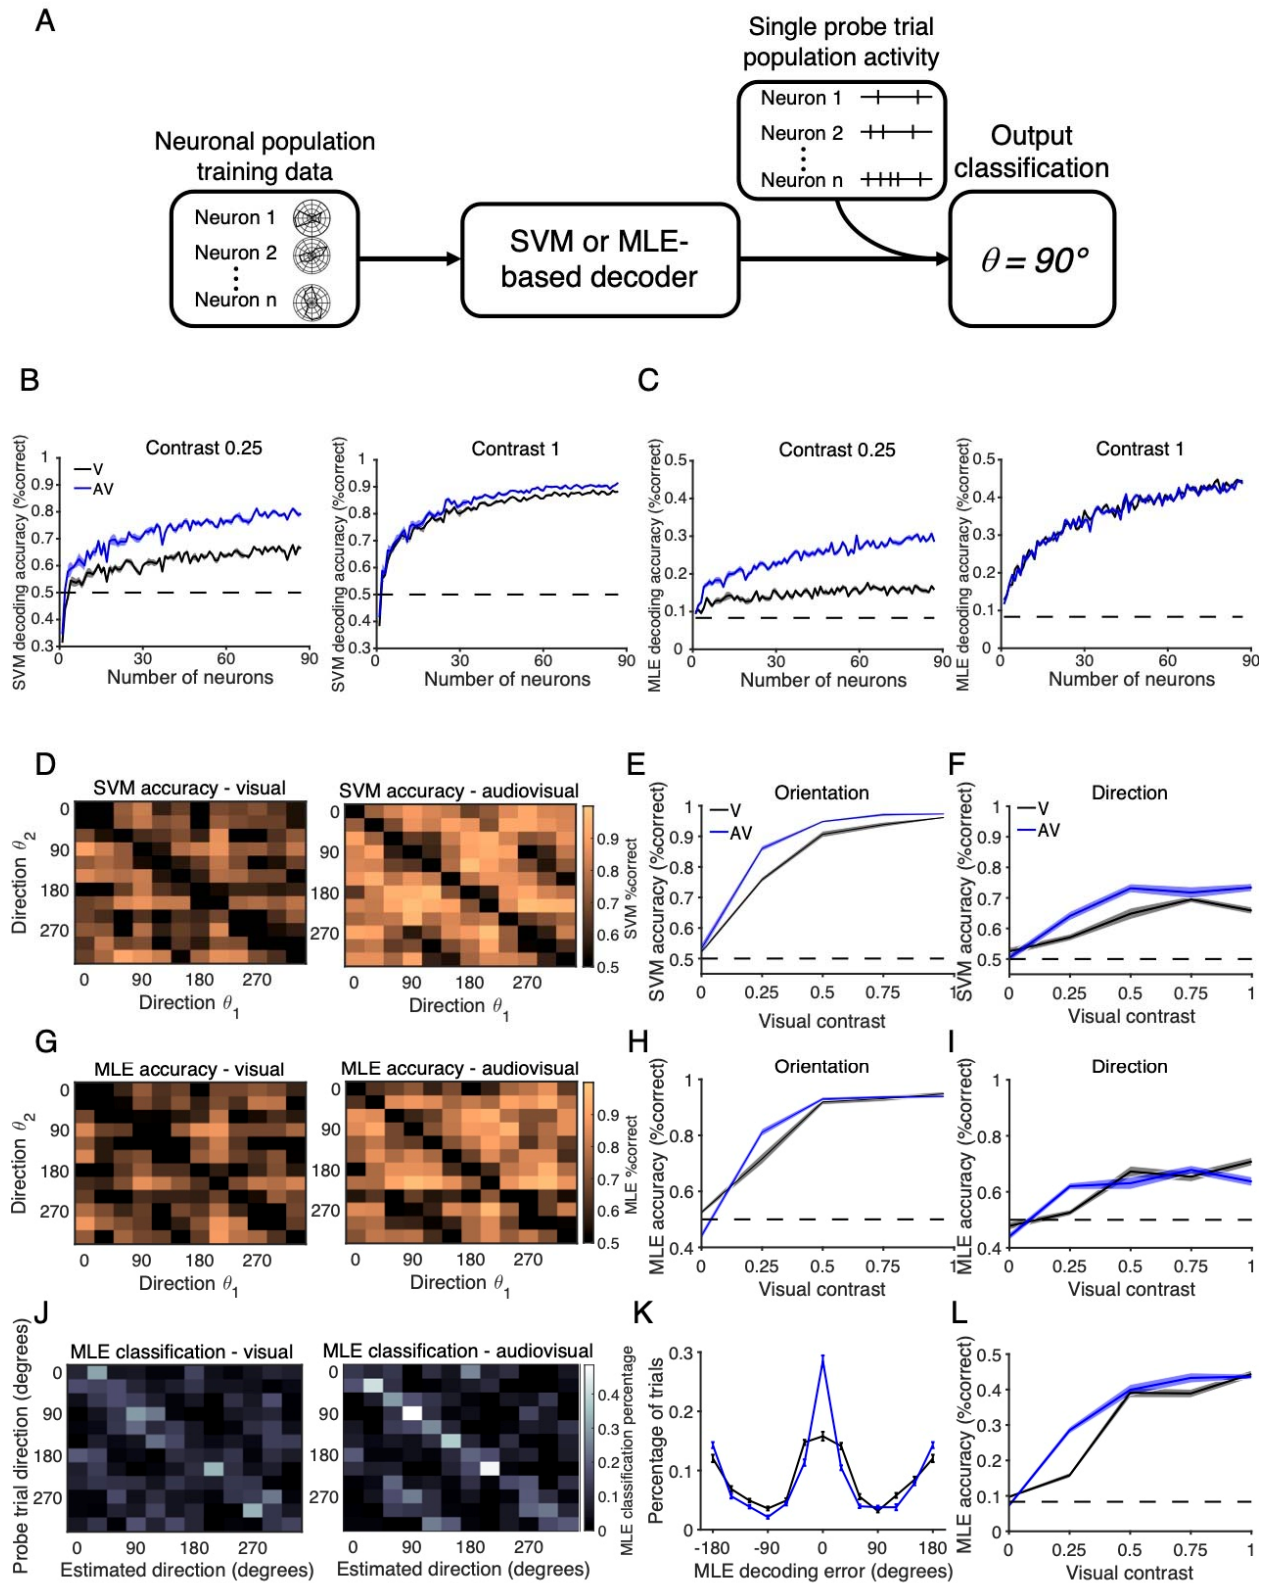

724

725

726

**Figure 8 | Sound improves accuracy of population-based visual stimulus decoding** (A) Schematic illustrating the decoding of the drifting grating direction using either an SVM or MLE decoder trained on neuronal population



727 activity. (B) Accuracy of SVM pairwise classification, average across all direction pairs, as the neuronal population  
728 size included in the decoder increases. Visual contrast 0.25 is on the left, and full visual contrast is on the right. (C)  
729 Accuracy of MLE decoding 1 of 12 drifting grating options, as the neuronal population size increases. Again, visual  
730 contrast 0.25 is on the left, and full visual contrast is on the right. (D) Accuracy of SVM pairwise classification of  
731 drifting grating directions on visual (left) and audiovisual (right) trials, contrast 0.25. (E) SVM decoding accuracy  
732 improved with sound when classifying orthogonal drifting grating orientations ( $n=10$  randomizations,  $p(\text{vis})=1.8\text{e-}61$ ,  
733  $p(\text{aud})=1.9\text{e-}8$ ,  $p(\text{interact})=2.4\text{e-}4$ , 2-way ANOVA, post hoc Bonferroni-corrected paired t-test). (F) SVM  
734 decoding accuracy when classifying opposite drifting grating directions, demonstrating improved performance with  
735 sound ( $n=10$  randomizations,  $p(\text{vis})=1.1\text{e-}21$ ,  $p(\text{aud})=9.0\text{e-}9$ ,  $p(\text{interact})=0.0019$ , 2-way ANOVA, post hoc  
736 Bonferroni-corrected paired t-test). (G) Accuracy of MLE pairwise classification of drifting gratings on visual (left)  
737 and audiovisual (right) trials, contrast 0.25. (H) MLE decoding accuracy when classifying orthogonal drifting grating  
738 orientations improved with sound ( $n=10$  randomizations,  $p(\text{vis})=2.3\text{e-}66$ ,  $p(\text{aud})=0.61$ ,  $p(\text{interact})=9.6\text{e-}11$ , 2-way  
739 ANOVA, post hoc Bonferroni-corrected paired t-test). (I) MLE decoding accuracy when classifying opposite drifting  
740 grating directions, demonstrating less effect of sound on performance ( $n=10$  randomizations,  $p(\text{vis})=4.6\text{e-}26$ ,  
741  $p(\text{aud})=0.51$ ,  $p(\text{interact})=4.1\text{e-}6$ , 2-way ANOVA, post hoc Bonferroni-corrected paired t-test). (J) Heat map of actual  
742 vs MLE-output directions under visual (left) and audiovisual (right) trials, contrast 0.25. MLE decoder could choose  
743 between all 12 drifting grating directions. (K) MLE decoder classification percentage, comparing estimated  
744 direction to actual direction. (L) Overall decoding accuracy of MLE decoder when choosing between all 12 drifting  
745 grating directions improved with sound ( $n=20$  randomizations,  $p(\text{vis})=2.2\text{e-}92$ ,  $p(\text{aud})=1.9\text{e-}5$ ,  $p(\text{interact})=2.7\text{e-}11$ ,  
746 2-way ANOVA, post hoc Bonferroni-corrected paired t-test).

747  
748 indicate that sound improves neuronal encoding of the visual stimulus both in individual neurons  
749 and at a population level, especially at intermediate visual contrast levels.  
750

### 751 **Sound improves stimulus decoding when controlling for sound-induced movements**

752 It is known that locomotion improves visual processing in V1 (Dardalat and Stryker, 2017). We  
753 next tested whether the sound-induced improvement in visual stimulus representation (Figure 8)  
754 was attributable to sound's effect on visual responses or indirectly via sound-induced  
755 movement. As we previously observed, sound and movement enhanced the onset and  
756 sustained portion of the visual response, respectively (Figure 6). We therefore hypothesized that  
757 the improvement on MLE decoding performance, based on the visual response onset, would be  
758 present even when accounting for sound-induced uninstructed movements. We tested this  
759 hypothesis by expanding  
760 on the GLM-based classification of neurons described in Figure 6. Using the same GLM  
761 generated for each neuron, we modified the movement variable and its corresponding pairwise  
762 predictors to the lowest observed value, and then used the GLM coefficients and the  
763 exponential nonlinearity to estimate each neuron's audiovisual response magnitude when  
764 regressing out the effect of motion (Figure 9A, Materials and Methods). We then input these  
765 estimated trial-wise neuronal responses into the same MLE-based decoder described above.  
766 Using this approach, we found that in individual orientation-selective neurons, controlling for the  
767 effect of motion on audiovisual trials had little effect on decoding accuracy across contrast levels  
768 (Figure 9B-C;  $p(\text{vis})=7.7\text{e-}93$ ,  $p(\text{aud})=0.055$ ,  $p(\text{interact})=0.058$ , paired 2-way ANOVA, Table 1).  
769 However, regressing out both sound and motion from the audiovisual responses resulted in  
770 decoding accuracy that resembled that on visual trials (Figure 9B-C;  $p(\text{vis})=8.1\text{e-}95$ ,  $p(\text{aud}) =$   
771  $0.55$ ,  $p(\text{interact})=0.24$ , paired 2-way ANOVA, Table 1). These results in individual neurons  
772 indicate that sound and not movement primarily drives the improvements in decoding accuracy  
773 in audiovisual trials. We found similar results when implementing this approach in the MLE-  
774 based population decoder. We again found that that decoding performance on audiovisual trials  
775 when regressing out motion was still significantly improved compared to that on visual trials  
776 (Figure 9D-E;  $p(\text{vis})=1.4\text{e-}38$ ,  $p(\text{aud})=6.0\text{e-}8$ ,  $p(\text{interact})=0.0015$ , 2-way ANOVA;  $p_{c=0}=0.30$ ,  
777  $p_{c=0.25}=0.0012$ ,  $p_{c=0.5}=0.0022$ ,  $p_{c=0.75}=0.0044$ ,  $p_{c=1}=0.35$ , Bonferroni-corrected paired t-test).



778 Furthermore, regression of both sound and movement from audiovisual trials resulted in  
779 population decoding performance similar to that on visual trials (Figure 9D-E;  $p(\text{vis})=2.5e-39$ ,  
780  $p(\text{aud})=0.48$ ,

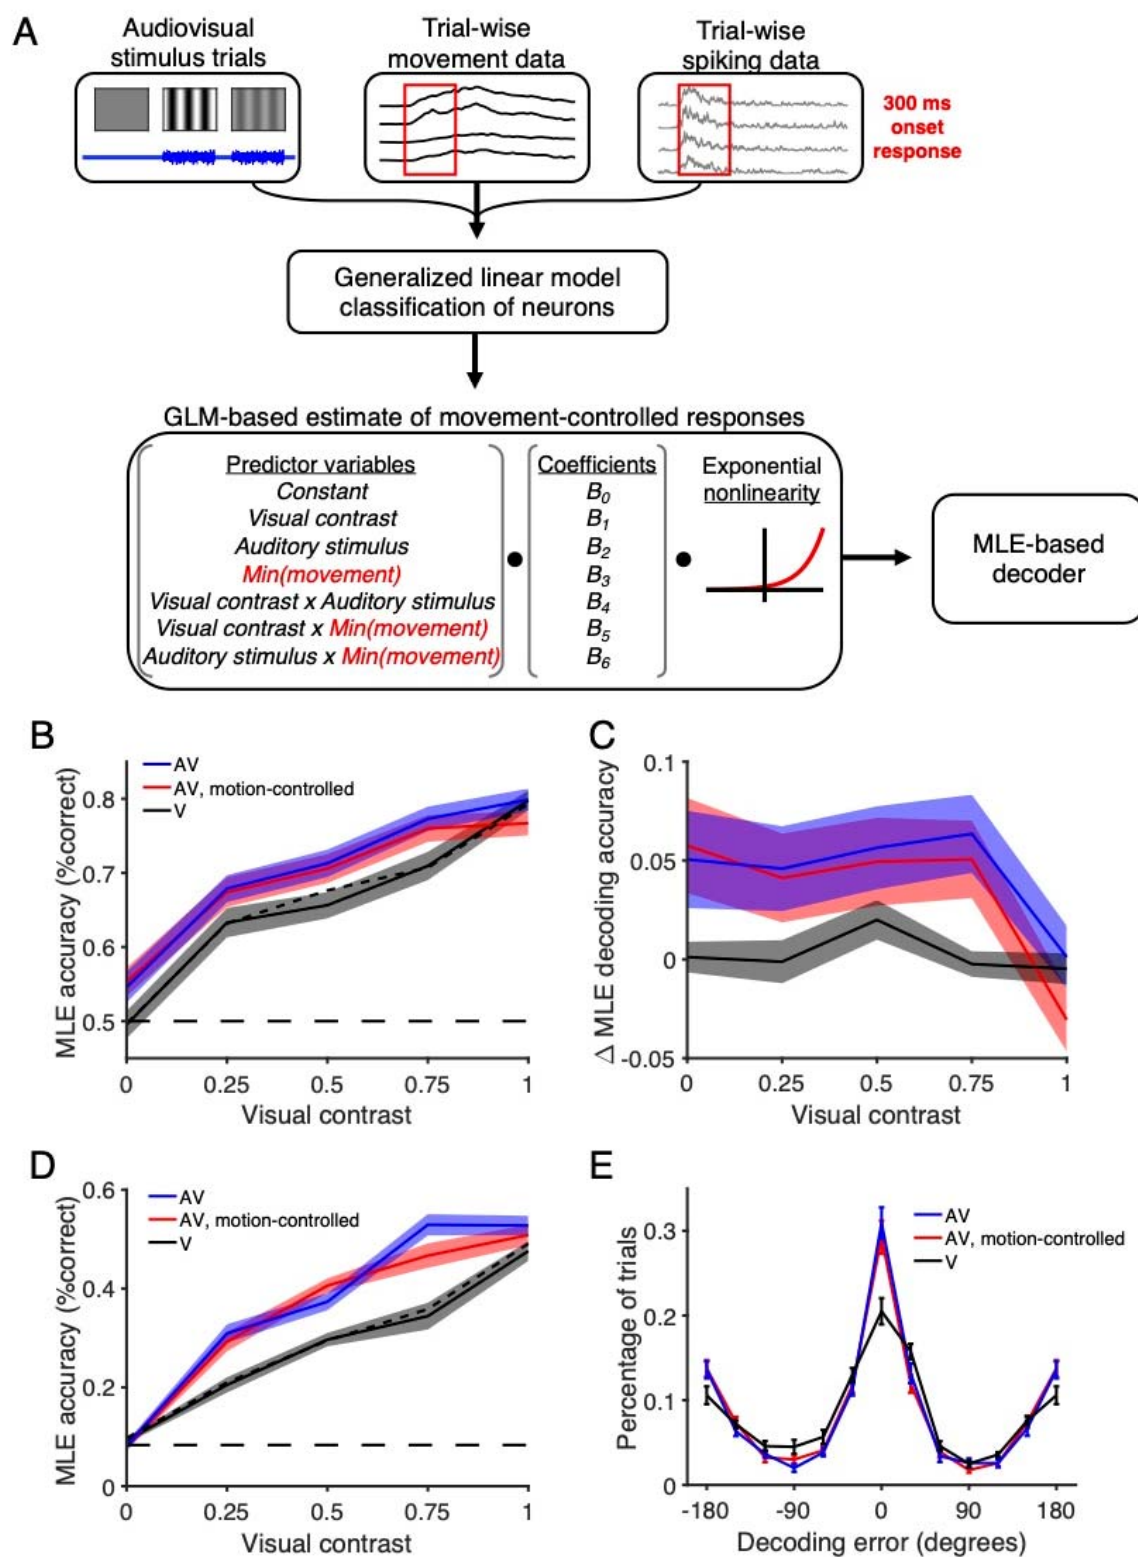

781  
782 **Figure 9 | Sound improved decoding performance when controlling for motion.** (A) Diagram illustrating the use of  
783 a GLM to calculate each predictor variable's coefficient. These are then used when varying the predictor variables  
784 to estimate trial-wise neuronal responses, which are then into the MLE-based decoder. (B) Absolute accuracy of

785 decoding orientation among orientation-selective, sound/motion-modulated light-responsive neurons, comparing  
786 visual responses (black, solid) to audiovisual responses (blue) and audiovisual responses when regressing out  
787 motion (red). The finely dotted line represents audiovisual responses when controlling for the effects of both  
788 motion and sound. (C) Relative decoding accuracy compared to decoding on visual trials. Regressing out motion  
789 did not reduce performance compared to audiovisual trials ( $n=85$  neurons,  $p(\text{vis})=7.7e-93$ ,  $p(\text{aud})=0.055$ ,  
790  $p(\text{interact})=0.058$ , paired 2-way ANOVA), whereas regressing out both motion and sound resulted in comparable  
791 performance to visual trials ( $n=85$  neurons,  $p(\text{vis})=8.1e-95$ ,  $p(\text{aud})=0.55$ ,  $p(\text{interact})=0.24$ , paired 2-way ANOVA).  
792 (D) Population decoding accuracy of population-based decoder on audiovisual trials (blue) is preserved even when  
793 controlling for motion (red) compared to decoding of visual trials (black;  $n=10$  randomizations,  $p(\text{vis}) = 1.4e-38$ ,  
794  $p(\text{aud})=6.0e-8$ ,  $p(\text{interact})=0.0015$ , 2-way ANOVA;  $p_{c=0}=0.30$ ,  $p_{c=0.25}=0.0012$ ,  $p_{c=0.5}=0.0022$ ,  $p_{c=0.75}=0.0044$ ,  $p_{c=1}=0.35$ ,  
795 Bonferroni-corrected paired t-test). The finely black dotted line represents decoding accuracy when regressing out  
796 both sound and motion. (E) MLE decoder classification percentage, comparing estimated direction to actual  
797 direction, contrast 0.25. Little difference is observed between audiovisual trials and audiovisual trials when  
798 controlling for motion, whereas both are more accurate than visual trials.

799  
800  
801  $p(\text{interact})=0.99$ , 2-way ANOVA). These results demonstrate that sound improves visual  
802 stimulus decoding on audiovisual trials at both a single neuron and population level. Moreover,  
803 this enhancement persists when controlling for sound-induced motion.

## 804 805 806 **Discussion**

807  
808 Audiovisual integration is an essential aspect of sensory processing (Stein et al., 2020). In  
809 humans, audiovisual integration is used in everyday behaviors such as speech perception and  
810 object recognition (Fujisaki et al., 2014). In animal models, audiovisual integration improves the  
811 detection and discriminability of unisensory auditory and visual stimuli (Gleiss and Kayser, 2012;  
812 Meijer et al., 2018). However, the neuronal mechanisms underlying these behavioral  
813 improvements are still being investigated. Specifically, it remains unclear how sound-induced  
814 changes in spiking activity affect neuronal encoding of the visual stimulus. Furthermore, whether  
815 the reported audiovisual integration can more accurately be attributed to sound-induced  
816 movement is still being clarified.

817  
818 The goal of the present study was to test whether sound drives not and improvement in  
819 encoding and decoding of sounds in awake subjects, and to test the hypothesis that sound  
820 improves neuronal encoding of visual stimuli in V1 independent of sound-induced movement.  
821 We performed extracellular recordings in V1 while presenting combinations of visual drifting  
822 gratings and auditory white noise and recording movement of awake mice. The drifting gratings  
823 were presented at a range of visual contrast levels to determine the threshold levels at which  
824 sound is most effective. As in previous studies, we found neurons in V1 whose spontaneous  
825 and visually evoked firing rates are modulated by sound (Figure 3). Notably, the effects we  
826 observed were stronger and more response-enhancing than in previous studies (80.1% of  
827 neurons were modulated by sound, with ~95% exhibiting sound-induced increases in firing  
828 rate). When accounting for movement in awake animal subjects, we found that the neurons'  
829 audiovisual responses actually represented a mixed effect of both sound- and movement-  
830 sensitivity (Figure 5), an effect in which sound primarily enhances the onset response whereas  
831 movement complementarily enhances the sustained response (Figure 6). We also found that  
832 sound-induced changes in response magnitude and consistency combined to improve the  
833 discriminability of drifting grating orientation and direction in individual neurons and at a  
834 population level (Figure 7). The improvements in neuronal encoding were most pronounced at  
835 low to intermediate visual contrast levels, a finding that supports the current understanding that

836 audiovisual integration is most beneficial for behavioral performance under ambiguous  
837 unisensory conditions (Gleiss and Kayser, 2012; Meijer et al., 2018; Stein et al., 2020), as found  
838 in human psychophysics (Lippert et al., 2007; Chen et al., 2011). Importantly, the improvement  
839 in neuronal encoding was based on firing at the onset of the visual response, indicating that the  
840 auditory signal itself is responsible for improvements in visual encoding and not attributable to  
841 uninstructed movements. This was directly demonstrated by the persistence of sound-induced  
842 improvements in stimulus decoding, even when controlling for the effect of motion (Figure 9).

843

#### 844 **Auditory and locomotive inputs distinctly shape visual responses**

845 We present the novel finding that sound and movement have distinct and complementary  
846 effects on visual responses. Specifically, we found that sound primarily enhances the firing rate  
847 at the onset of the visual response, whereas motion enhances the firing rate during the  
848 sustained period of the visual response (Figure 6F-H). Prior audiovisual studies in the awake  
849 brain of mice used calcium imaging (Meijer et al, 2017; McClure and Polack 2019), a recording  
850 modality limited to the supragranular layers of V1. Additionally, the temporal resolution of  
851 calcium imaging limits the ability to detect the temporal differences in how sound and movement  
852 independently affect V1 responses in the awake brain. Therefore, our use of a depth electrode  
853 that spanned the cortical layers for electrophysiology in the awake brain enabled robust  
854 characterization of distinct temporal effects of sound and movement on visual responses.

855

856 Our initial classification of sound-modulated neurons and the subsequent decoding analyses  
857 were based on firing rates during the onset period. Therefore, despite robust differences in  
858 movement during visual and audiovisual trials, motion was unable to account for the sound-  
859 induced changes in neuronal responses that resulted in improved neuronal encoding (Figure 9).  
860 The distinct effects that sound and locomotion have on visual responses also adds nuance to  
861 our understanding of how motion affects visual processing, as other groups have predominantly  
862 used responses averaged across the duration of the stimulus presentation in categorizing  
863 motion responsive neurons in V1 (Neil and Stryker, 2010; Dardalat and Stryker, 2017). Our  
864 findings indicate that the timing of cross-sensory interactions is an important factor in the  
865 classification and quantification of multisensory effects.

866

867 We also observed that motion decreases the magnitude of the enhancing effect that sound has  
868 on the onset of the visual response (Figure 5E, 6H). This finding suggests a degree of  
869 suppressive effect that motion has on this audiovisual interaction. A potential mechanism for this  
870 result may relate to the circuits underlying audiovisual integration in V1. Other groups have  
871 shown using retrograde tracing, optogenetics and pharmacology that the AC projects directly to  
872 V1 and is responsible for the auditory signal in this region (Falchier et al., 2002; Ibrahim et al.,  
873 2016; Deneux et al., 2019). It is currently understood that unlike in V1, in other primary sensory  
874 cortical areas including the AC movement suppresses sensory evoked activity (Nelson et al.,  
875 2013; Schneider and Mooney, 2018; Bigelow et al., 2019). Therefore, one explanation for this  
876 observation is that despite motion enhancing the visual response magnitude in the absence of  
877 sound, the suppressive effect that motion has on sound-evoked responses in the AC leads to  
878 weaker AC enhancement of visual activity on trials in which the mice move. A detailed  
879 experimental approach using optogenetics or pharmacology would be required to test this  
880 hypothesis of a tripartite interaction and would also reveal the potential contribution of other  
881 auditory regions.

882

#### 883 **Enhanced response magnitude and consistency combine to improve neuronal encoding**

884 Signal detection theory indicates that improved encoding can be mediated both by enhanced  
885 signal magnitude as well as reduced levels of noise (von Trapp et al., 2016). When using purely  
886 magnitude-based metrics of discriminability, OSI and DSI, we found a small reduction from the

887 visual to audiovisual conditions (Figure 3J,K). However, we also observed that sound reduced  
888 the CV of visual responses (Figure 4), a measure of the trial-to-trial variability in response.  
889 When we measured the  $d'$  sensitivity index of neuronal responses, a measure that factors in  
890 both the mean response magnitude and trial-to-trial variability, we found that sound improved  
891 the discriminability of drifting grating orientation and direction (Figure 7A,B). These findings  
892 indicate that the improved discriminability of visual responses in individual neurons was  
893 mediated not only by changes in response magnitude but also by the associated improvement  
894 in response consistency between trials. Prior studies using patch-clamp approaches showed  
895 that V1 neurons in anesthetized animals improve visual encoding by sharpening their tuning  
896 profiles (Ibrahim et al., 2016), a magnitude-based coding scheme. The difference between  
897 these findings and those reported in the current study potentially represent different coding  
898 schemes present in anesthetized and awake brains. It is therefore important to consider  
899 response variability in awake brains in addition to magnitude-based metrics when quantifying  
900 tuning and discriminability in neurons (Churchland et al., 2011; Mazurek et al., 2014).

901  
902 Prior studies using calcium imaging found equivocal results when investigating whether sound-  
903 induced changes in visual responses led to improved population encoding of the visual stimulus  
904 (Meijer et al., 2017). The improved discriminability of grating orientation and direction by  
905 individual neurons supports our finding that the presence of sound enhances population  
906 encoding of the visual stimulus. Again, one explanation for this difference may be the recording  
907 modality and analysis parameters. We performed electrophysiological recordings of spiking  
908 activity and limited our quantification to the onset of the stimulus (0-300 ms), the time window in  
909 which there was the greatest change in firing rate across neurons. Our focus on the onset  
910 response was based on our initial finding that mutual information between the neuronal  
911 responses and visual stimuli was highest during this onset period, a finding supported by  
912 previous studies (Figure 2; Dardalot and Stryker, 2017). Calcium imaging, however, may lack  
913 the temporal resolution required to detect the trial-by-trial differences in spiking activity  
914 associated with improved neuronal discriminability during this timeframe. Extracellular  
915 electrophysiology also allowed us to take advantage of large numbers of neurons from a range  
916 of cortical depths in awake animals to include in the population analysis, as opposed to patch-  
917 clamp approaches with a limited number of neurons (Ibrahim et al., 2016). Finally, presenting a  
918 wide range of visual contrast levels allowed us to demonstrate that sound improves neuronal  
919 encoding at low to intermediate contrasts, above which further improvement is difficult to  
920 demonstrate due to already reliable encoding in the absence of sound. Altogether, these  
921 differences in methodology allowed us to more directly demonstrate that V1 neuronal encoding  
922 of visual stimuli is improved by sound in the awake brain, as well as disentangle the  
923 contributions of sound and sound-induced motion in that process.

### 924 925 **Stimulus parameters relevant to audiovisual integration**

926 Sensory neurons are often tuned to specific features of unisensory auditory and visual stimuli,  
927 and these features are relevant to cross-sensory integration of the signals. In the current study  
928 we paired the visual drifting gratings with a static burst of auditory white noise as a basic well-  
929 controlled stimulus. Previous studies found that temporally congruent audiovisual stimuli, e.g.  
930 amplitude-modulated sounds accompanying visual drifting gratings, evoke larger changes in  
931 response than temporally incongruent stimuli in the mouse visual cortex (Meijer et al., 2017;  
932 Atilgan et al., 2018), and therefore using such stimuli would potentially result in even stronger  
933 effects than we observed. Auditory pure tones can also induce changes in V1 visual responses  
934 (McClure and Polack, 2019). However, in other brain regions such as the inferior colliculus,  
935 audiovisual integration is highly dependent on spatial congruency between the unimodal inputs  
936 (Bergan and Knudsen, 2009). Additional studies are needed to explore the full range of auditory  
937 stimulus parameters relevant to visual responses in V1.



938  
939 Our results show that spatially congruent, static white noise is sufficient to improve V1 neuronal  
940 response magnitude and latency to light-evoked responses. These results likely extend to  
941 natural and ethologically relevant stimuli as well. Indeed, rhesus macaque monkeys  
942 demonstrate psychometric and neurometric improvements in tasks such as conspecific  
943 vocalization detection and object recall (Hwang and Romanski, 2015; Bigelow and Poremba,  
944 2016; Breman et al., 2017). Humans are also capable of perceptually integrating audiovisual  
945 stimuli ranging from paired visual drifting gratings and auditory white noise (Lippert et al., 2007;  
946 Chen et al., 2007), to the McGurk effect and virtual reality simulated driving (McGurk and  
947 MacDonald, 1976; Marucci et al., 2021). We therefore posit that the audiovisual integration of  
948 basic sensory stimuli in early sensory areas may form the foundation for functional integration  
949 by higher cortical areas and ultimately behavioral improvements.

### 950 **Neuronal correlates of multisensory behavior**

951 Our findings of multisensory improvements in neuronal performance are supported by  
952 numerous published behavioral studies in humans and various model organisms (Gleiss and  
953 Kayser, 2012; Meijer et al., 2018; Stein et al., 2020). Training mice to detect or discriminate  
954 audiovisual stimuli allows the generation of psychometric performance curves in the presence  
955 and absence of sound. We would hypothesize that the intermediate visual contrast levels in  
956 which we see improvements in neural encoding would align with behavioral detection threshold  
957 levels. One could also correlate the trial-by-trial neural decoding of the visual stimulus with the  
958 behavioral response on a stimulus discriminability task, an analysis that could provide  
959 information about the proximity of the V1 responses to the behavioral perception and decision.  
960 Additionally, a behavioral task could allow the comparison of neural responses between passive  
961 and active observing, helping to reveal the role of attention on how informative or distracting one  
962 stimulus is about the other.

### 963 **Multisensory integration in other systems**

964 It is useful to contextualize audiovisual integration by considering multisensory integration that  
965 occurs in other primary sensory cortical areas. The auditory cortex contains visually responsive  
966 neurons and is capable of binding temporally congruent auditory and visual stimulus features in  
967 order to improve deviance detection within the auditory stimulus (Atilgan et al., 2018; Morrill and  
968 Hasenstaub, 2018). Additionally, in female mice, pup odors reshape AC neuronal responses to  
969 various auditory stimuli and drive pup retrieval behavior (Cohen et al., 2011; Marlin et al., 2015),  
970 demonstrating integration of auditory and olfactory signals. However, whether these forms of  
971 multisensory integration rest on similar coding principles of improved SNR observed in the  
972 current V1 study is unknown. Investigation into this relationship between the sensory cortical  
973 areas will help clarify the neuronal codes that support multisensory integration, and the  
974 similarities and differences across sensory domains.

### 975 **Acknowledgements**

976 The authors thank Gabrielle Samulewicz for assistance with experiments and members of the  
977 Geffen laboratory for helpful discussions, as well as Dr. Jay Gottfried and Dr. Yale Cohen at the  
978 University of Pennsylvania. This work was supported by funding by the National Institute on  
979 Deafness and Other Communication Disorders at the National Institute of Health grants  
980 5T32DC016903 to AMW, F31DC016524 to CFA, and R01DC015527, R01DC014479, and  
981 R01NS113241 to MNG.

982  
983  
984  
985  
986  
987

## References

- 988  
989  
990 Atilgan, H., Town, S. M., Wood, K. C., Jones, G. P., Maddox, R. K., Lee, A., & Bizley, J. K.  
991 (2018). Integration of Visual Information in Auditory Cortex Promotes Auditory Scene  
992 Analysis through Multisensory Binding. *Neuron*, 97(3), 640–655.e4.  
993 <https://doi.org/10.1016/j.neuron.2017.12.034>
- 994 Bergan, J.F., Knudsen, E.I. (2009). Visual modulation of auditory responses in the owl  
995 inferior colliculus. *J Neurophysiol*, 101(6):2924-33. Doi: 10.1152/jn.91313.2008
- 996 Berens, P., Ecker, A.S., Cotton, R.J., Ma, W.J., Bethge, M., Tolias, A.S. (2012) A fast and  
997 simple population code for orientation in primate V1. *J Neurosci*, 32(31): 10618-26. doi:  
998 10.1523/JNEUROSCI.1335-12.2012
- 999 Bigelow, J., Poremba, A. (2016) Audiovisual integration improves monkeys' short-term  
1000 memory. *Anim Cogn*, 19(4): 799-811. Doi: 10.1007/s10071-016-0979-0
- 1001 Bigelow, J., Morrill, R.J., Dekloe, J., Hasenstaub, A.R. (2019) Movement and VIP  
1002 interneuron activation differentially modulate encoding in mouse auditory cortex. *eNeuro*,  
1003 6(5); ENEURO.0164-19.2019. doi: 10.1523/ENEURO.0164-19.2019
- 1004 Bimbard, C., Sit, T.P.H., Lebedeva, A., Harris, K.D., Carandini, M. (2021) Behavioral origin  
1005 of sound-evoked activity in visual cortex. *BioRxiv*. Doi:  
1006 <https://doi.org/10.1101/2021.07.01.450721>
- 1007 Borst, A., Theunissen, F.E. (1999) Information theory and neural coding. *Nat Neurosci*,  
1008 2(11):947-57. Doi: 10.1038/14731
- 1009 Breman, P., Massoudi, R., Wanrooij, M.M.V., Van Opstal, A.J. (2017) Audio-visual  
1010 integration in a redundant target paradigm: A comparison between rhesus macaque and  
1011 man. *Front Syst Neurosci*, 11:89. Doi: 10.3389/fnsys.2017.00089
- 1012 Churchland, A.K., Kiani, R., Chaudhuri, R., Wang, X., Pouget, A., Shadlen, M.N. (2011)  
1013 Variance as a signature of neural computations during decision making. *Neuron*, 69(4):818-  
1014 31. Doi: 10.1016/j.neuron.2010.12.037
- 1015 Cohen, L., Rothschild, G., Mizrahi, A. (2011). Multisensory integration of natural odors and  
1016 sounds in the auditory cortex. *Neuron*, 72(2): 357-69. Doi: 10.1016/j.neuron.2011.08.019
- 1017 Colonius, H., & Diederich, A. (2017). Measuring multisensory integration: from reaction  
1018 times to spike counts. *Scientific reports*, 7(1), 3023. [https://doi.org/10.1038/s41598-017-](https://doi.org/10.1038/s41598-017-03219-5)  
1019 [03219-5](https://doi.org/10.1038/s41598-017-03219-5)
- 1020 Crosse, M. J., Butler, J. S., & Lalor, E. C. (2015). Congruent Visual Speech Enhances  
1021 Cortical Entrainment to Continuous Auditory Speech in Noise-Free Conditions. *The Journal*  
1022 *of neuroscience: the official journal of the Society for Neuroscience*, 35(42), 14195–14204.  
1023 <https://doi.org/10.1523/JNEUROSCI.1829-15.2015>
- 1024 Dardalat M.C., Stryker M.P. (2017) Locomotion enhances neural encoding of visual stimuli  
1025 in mouse V1. *J Neurosci*, 37(14):3764-75. Doi: [10.1523/JNEUROSCI.2728-16.2017](https://doi.org/10.1523/JNEUROSCI.2728-16.2017)

- 1026 Deneux T., Harrell E.R., Kempf A., Ceballo S., Filipchuk A., Bathellier B. (2019) Context-  
1027 dependent signaling of coincident auditory and visual events in primary visual cortex. *eLife*  
1028 8: e44006. doi: [10.7554/eLife.44006](https://doi.org/10.7554/eLife.44006)
- 1029 Denison, R. N., Driver, J., & Ruff, C. C. (2013). Temporal structure and complexity affect  
1030 audio-visual correspondence detection. *Frontiers in psychology*, 3, 619.  
1031 <https://doi.org/10.3389/fpsyg.2012.00619>
- 1032 Diederich, A., & Colonius, H. (2004). Bimodal and trimodal multisensory enhancement:  
1033 effects of stimulus onset and intensity on reaction time. *Perception & psychophysics*, 66(8),  
1034 1388–1404. <https://doi.org/10.3758/bf03195006>
- 1035 Fahey, P.G., Muhammad, T., Smoth, C., Froudarakis, E., Cobos, E., Fu, J., Walker, E.Y.,  
1036 Yatsenko, D., Sinz, F.H., Reimer, J., Tolias, A.S. (2019). A global map of orientation tuning  
1037 in mouse visual cortex. *BioRxiv*.
- 1038 Falchier, A., Clavagnier, S., Barone, P., Kennedy, H. (2002) Anatomical evidence of  
1039 multimodal integration in primate striate cortex. *J Neurosci*, 22(13): 5749-59. Doi:  
1040 10.1523/JNEUROSCI.22-13-05749.2002.
- 1041 Fujisaki, W., Goda, N., Motoyoshi, I., Komatsu, H., Nishida, S. (2014) Audiovisual integration  
1042 in the human perception of materials. *J Vis*, 14(4):12. doi: 10.1167/14.4.12
- 1043 Gingras, G., Rowland, B. A., & Stein, B. E. (2009). The differing impact of multisensory and  
1044 unisensory integration on behavior. *The Journal of neuroscience : the official journal of the*  
1045 *Society for Neuroscience*, 29(15), 4897–4902. [https://doi.org/10.1523/JNEUROSCI.4120-](https://doi.org/10.1523/JNEUROSCI.4120-08.2009)  
1046 08.2009
- 1047 Gleiss, S., & Kayser, C. (2012). Audio-visual detection benefits in the rat. *PLoS one*, 7(9),  
1048 e45677. <https://doi.org/10.1371/journal.pone.0045677>
- 1049 Gur, M., Beylin, A., Snodderly, D.M. (1997) Response variability of neurons in primary visual  
1050 cortex (V1) of alert monkeys. *J Neurosci*, 17(8):2914-20. doi: 10.1523/JNEUROSCI.17-08-  
1051 02914.1997
- 1052 Hammond-Kenny, A., Bajo, V. M., King, A. J., & Nodal, F. R. (2017). Behavioural benefits of  
1053 multisensory processing in ferrets. *The European journal of neuroscience*, 45(2), 278–289.  
1054 <https://doi.org/10.1111/ejn.13440>
- 1055 Hirokawa, J., Sadakane, O., Sakata, S., Bosch, M., Sakurai, Y., & Yamamori, T. (2011).  
1056 Multisensory information facilitates reaction speed by enlarging activity difference between  
1057 superior colliculus hemispheres in rats. *PLoS one*, 6(9), e25283.  
1058 <https://doi.org/10.1371/journal.pone.0025283>
- 1059 Hwang, J., Romanski, L. (2015) Prefrontal neuronal responses during audiovisual  
1060 mnemonic processing. *J Neurosci*, 35(3): 960-71. Doi: 10.1523/JNEUROSCI.1328-14.2015
- 1061 Ibrahim, L. A., Mesik, L., Ji, X. Y., Fang, Q., Li, H. F., Li, Y. T., Zingg, B., Zhang, L. I., & Tao,  
1062 H. W. (2016). Cross-Modality Sharpening of Visual Cortical Processing through Layer-1-  
1063 Mediated Inhibition and Disinhibition. *Neuron*, 89(5), 1031–1045.  
1064 <https://doi.org/10.1016/j.neuron.2016.01.027>

- 1065 Knöpfel, T., Sweeney, Y., Radulescu, C. I., Zabouri, N., Doostdar, N., Clopath, C., & Barnes,  
1066 S. J. (2019). Audio-visual experience strengthens multisensory assemblies in adult mouse  
1067 visual cortex. *Nature communications*, 10(1), 5684. [https://doi.org/10.1038/s41467-019-](https://doi.org/10.1038/s41467-019-13607-2)  
1068 13607-2
- 1069 Maddox, R. K., Atilgan, H., Bizley, J. K., & Lee, A. K. (2015). Auditory selective attention is  
1070 enhanced by a task-irrelevant temporally coherent visual stimulus in human  
1071 listeners. *eLife*, 4, e04995. <https://doi.org/10.7554/eLife.04995>
- 1072 Marlin, B.J., Mitre, M., D'amour, J.A., Chao, M.V., Froemke, R.C. (2015). Oxytocin enables  
1073 maternal behavior by balancing cortical inhibition. *Nature*, 520(7528): 499-504. doi:  
1074 10.1038/nature14402
- 1075 Marucci, M., Flumeri, G.D., Borghini, G., Sciaraffa, N., Scandola, M., Pavone, E.F., Babiloni,  
1076 F., Betti, V., Arco, P. (2021) The impact of multisensory integration and perceptual load in  
1077 virtual reality settings on performance, workload and presence. *Sci Rep*, 11(1);4831. Doi:  
1078 10.1038/s41598-021-84196-8.
- 1079 Mazurek, M., Kager, M., Van Hooser, SD. (2014) Robust quantification of orientation  
1080 selectivity and direction selectivity. *Front in Neural Circuits*, 8: 92. Doi:  
1081 <https://doi.org/10.3389/fncir.2014.00092>
- 1082 McClure, J. P., Jr, & Polack, P. O. (2019). Pure tones modulate the representation of  
1083 orientation and direction in the primary visual cortex. *Journal of neurophysiology*, 121(6),  
1084 2202–2214. <https://doi.org/10.1152/jn.00069.2019>
- 1085 Mcgurk, H., and Macdonald, J. (1976). Hearing lips and seeing voices. *Nature* 264, 746–  
1086 748. doi: 10.1038/264746a0
- 1087 Meijer, G. T., Montijn, J. S., Pennartz, C., & Lansink, C. S. (2017). Audiovisual Modulation in  
1088 Mouse Primary Visual Cortex Depends on Cross-Modal Stimulus Configuration and  
1089 Congruency. *The Journal of neuroscience : the official journal of the Society for*  
1090 *Neuroscience*, 37(36), 8783–8796. <https://doi.org/10.1523/JNEUROSCI.0468-17.2017>
- 1091 Meijer, G. T., Pie, J. L., Dolman, T. L., Pennartz, C., & Lansink, C. S. (2018). Audiovisual  
1092 Integration Enhances Stimulus Detection Performance in Mice. *Frontiers in behavioral*  
1093 *neuroscience*, 12, 231. <https://doi.org/10.3389/fnbeh.2018.00231>
- 1094 Meijer, G. T., Mertens, P., Pennartz, C., Olcese, U., & Lansink, C. S. (2019). The circuit  
1095 architecture of cortical multisensory processing: Distinct functions jointly operating within a  
1096 common anatomical network. *Progress in neurobiology*, 174, 1–15.  
1097 <https://doi.org/10.1016/j.pneurobio.2019.01.004>
- 1098 Métin, C., Godement, P., & Imbert, M. (1988). The primary visual cortex in the mouse:  
1099 receptive field properties and functional organization. *Experimental brain research*, 69(3),  
1100 594–612. <https://doi.org/10.1007/BF00247312>
- 1101 Montijn J.S., Vinck M., Pennartz C.M.A. (2014) Population coding in mouse visual cortex:  
1102 response reliability and dissociability of stimulus tuning and noise correlation. *Front Comput*  
1103 *Neurosci* 8:58. Doi: 10.3389/fncom.2014.00058

- 1104 Morrill, R. J., & Hasenstaub, A. R. (2018). Visual Information Present in Infragranular Layers  
1105 of Mouse Auditory Cortex. *The Journal of neuroscience : the official journal of the Society for*  
1106 *Neuroscience*, 38(11), 2854–2862. <https://doi.org/10.1523/JNEUROSCI.3102-17.2018>
- 1107 Musall, S., Kaufman, M.T., Juavinett, A.L., Gluf, S., Churchland, A.K. (2019) Single-trial  
1108 neural dynamics are dominated by richly varied movements. *Nat Neurosci*, 22(10):1677-  
1109 1686. Doi: 10.1038/s41593-093-019-0502-4.
- 1110 Nelson A., Schneider D.M., Takatoh J., Sakurai K., Wang F., Mooney R. (2013) A circuit for  
1111 motor cortical modulation of auditory cortical activity. *J Neurosci*, 33(36):14342-53. Doi:  
1112 10.1523/JNEUROSCI.2275-13.2013.
- 1113 Niell, C.M., Stryker M.P. (2008) Highly receptive fields in mouse visual cortex. *J Neurosci*,  
1114 28(30): 7520-36. Doi: <https://doi.org/10.1523/JNEUROSCI.0623-08.2008>
- 1115 Niell C.M., Stryker M.P. (2010) Modulation of visual responses by behavioral state in mouse  
1116 visual cortex. *Neuron*, 65(4):472-9. Doi: 10.1016/j.neuron.2010.01.033.
- 1117 Quak, M., London, R. E., & Talsma, D. (2015). A multisensory perspective of working  
1118 memory. *Frontiers in human neuroscience*, 9, 197.  
1119 <https://doi.org/10.3389/fnhum.2015.00197>
- 1120 Pachitariu M., Steinmetz N., Kadir S., Carandini M., Harris K.D. (2016) Kilosort: realtime  
1121 spike-sorting for extracellular electrophysiology with hundreds of channels. *BioRxiv*. Doi:  
1122 <https://doi.org/10.1101/061481>
- 1123 Rochefort, N. L., Narushima, M., Grienberger, C., Marandi, N., Hill, D. N., & Konnerth, A.  
1124 (2011). Development of direction selectivity in mouse cortical neurons. *Neuron*, 71(3), 425–  
1125 432. <https://doi.org/10.1016/j.neuron.2011.06.013>
- 1126 Schneider D.M., Mooney R. (2018) How movement modulates hearing. *Annu Rev Neurosci*,  
1127 41:553-72. Doi: 10.1146/annurev-neuro-072116-031215.
- 1128 Shams L, Kamitani Y, Shimojo S (2002) Visual illusion induced by sound. *Brain Res Cogn*  
1129 *Brain Res* 14(1):147-52. Doi: 10.1016/s0926-6410(02)00069-1
- 1130 Stanislaw, H., Todorov, N. (1999) Calculation of signal detection theory measures. *Behav*  
1131 *Res Methods Instrum Comput*. 31(1):137-49. Doi: 10.3758/bf03207704
- 1132 Stein, B. E., Stanford, T. R., & Rowland, B. A. (2020). Multisensory Integration and the  
1133 Society for Neuroscience: Then and Now. *The Journal of neuroscience : the official journal*  
1134 *of the Society for Neuroscience*, 40(1), 3–11. [https://doi.org/10.1523/JNEUROSCI.0737-](https://doi.org/10.1523/JNEUROSCI.0737-19.2019)  
1135 19.2019
- 1136 Tye-Murray, N., Spehar, B., Myerson, J., Hale, S., & Sommers, M. (2016). Lipreading and  
1137 audiovisual speech recognition across the adult lifespan: Implications for audiovisual  
1138 integration. *Psychology and aging*, 31(4), 380–389. <https://doi.org/10.1037/pag0000094>
- 1139 von Trapp, G., Buran, B. N., Sen, K., Semple, M. N., & Sanes, D. H. (2016). A Decline in  
1140 Response Variability Improves Neural Signal Detection during Auditory Task



- 1141 Performance. *The Journal of neuroscience : the official journal of the Society for*  
1142 *Neuroscience*, 36(43), 11097–11106. <https://doi.org/10.1523/JNEUROSCI.1302-16.2016>
- 1143 Wang, Y., Celebrini, S., Trotter, Y., Barone, P. (2008) Visuo-auditory interactions in the  
1144 primary visual cortex of the behaving monkey: electrophysiological evidence. *BMC Neurosci*,  
1145 9:79. Doi: 10.1186/1471-2202-9-79
- 1146 Zhao X., Chen H., Liu X., Cang J. (2013) Orientation-selective responses in the mouse  
1147 lateral geniculate nucleus. *J Neurosci* 33(31):12751-763. Doi: [10.1523/JNEUROSCI.0095-](https://doi.org/10.1523/JNEUROSCI.0095-13.2013)  
1148 [13.2013](https://doi.org/10.1523/JNEUROSCI.0095-13.2013)
- 1149

**Table 1: Statistical comparisons**

| Comparison                                 | Fig | Test                   | Test statistic                                 | N                    | df                           | p-value                                                         | Post hoc test                                  | Post hoc $\alpha$ | Post hoc comparison    | Post hoc p-value |
|--------------------------------------------|-----|------------------------|------------------------------------------------|----------------------|------------------------------|-----------------------------------------------------------------|------------------------------------------------|-------------------|------------------------|------------------|
| Mean firing rate, V vs AV                  | 3C  | Paired 2-way ANOVA     | F(vis)=340<br>F(aud)=506<br>F(interact)=75     | 565 neurons          | vis=4<br>aud=1<br>interact=4 | p(vis) = 1.2e-100<br>p(aud) = 1.6e-88<br>p(interact) = 5.7e-4   | Bonferroni-corrected paired t-test             | 0.01              | Contrast 0, V vs AV    | 2.1e-50          |
|                                            |     |                        |                                                |                      |                              |                                                                 |                                                |                   | Contrast 0.25, V vs AV | 2.6e-62          |
|                                            |     |                        |                                                |                      |                              |                                                                 |                                                |                   | Contrast 0.5, V vs AV  | 5.7e-75          |
|                                            |     |                        |                                                |                      |                              |                                                                 |                                                |                   | Contrast 0.75, V vs AV | 1.1e-81          |
|                                            |     |                        |                                                |                      |                              |                                                                 |                                                |                   | Contrast 1, V vs AV    | 2.0e-81          |
| Linearity ratio, V vs AV                   | 3E  | Kruskal-Wallis test    | Chi-sq = 61                                    | 555 neurons          | 4                            | p = 1.6e-12                                                     | Bonferroni-corrected Wilcoxon signed rank test | 0.0125            | Contrast 0 vs 0.25     | 0.053            |
|                                            |     |                        |                                                |                      |                              |                                                                 |                                                |                   | Contrast 0 vs 0.5      | 0.0040           |
|                                            |     |                        |                                                |                      |                              |                                                                 |                                                |                   | Contrast 0 vs 0.75     | 4.6e-8           |
|                                            |     |                        |                                                |                      |                              |                                                                 |                                                |                   | Contrast 0 vs 1        | 2.1e-5           |
| Orientation selectivity index, V vs AV     | 3J  | Paired t-test          | t-stat = 3.2                                   | 78 neurons           | 77                           | p = 0.0018                                                      |                                                |                   |                        |                  |
| Direction selectivity index, V vs AV       | 3K  | Paired t-test          | t-stat = 2.7                                   | 12 neurons           | 11                           | p = 0.0206                                                      |                                                |                   |                        |                  |
| Onset response latency, V vs AV            | 4B  | Paired 2-way ANOVA     | F(vis)=5.7<br>F(aud)=64<br>F(interact)=2.7     | 517 neurons          | vis=3<br>aud=1<br>interact=3 | p(vis)=6.9e-4<br>p(aud)=6.8e-18<br>p(interact)=0.045            | Bonferroni-corrected paired t-test             | 0.01              | Contrast 0.25, V vs AV | 2.3e-4           |
|                                            |     |                        |                                                |                      |                              |                                                                 |                                                |                   | Contrast 0.5, V vs AV  | 7.1e-12          |
|                                            |     |                        |                                                |                      |                              |                                                                 |                                                |                   | Contrast 0.75, V vs AV | 4.6e-5           |
|                                            |     |                        |                                                |                      |                              |                                                                 |                                                |                   | Contrast 1, V vs AV    | 9.9e-4           |
| Onset response slope, V vs AV              | 4D  | Paired 2-way ANOVA     | F(vis)=70<br>F(aud)=66<br>F(interact)=2.8      | 563 neurons          | vis=3<br>aud=1<br>interact=3 | p(vis)=3.5e-121<br>p(aud) = 2.7e-15<br>p(interact) = 0.038      | Bonferroni-corrected paired t-test             | 0.01              | Contrast 0.25, V vs AV | 1.4e-4           |
|                                            |     |                        |                                                |                      |                              |                                                                 |                                                |                   | Contrast 0.5, V vs AV  | 8.9e-13          |
|                                            |     |                        |                                                |                      |                              |                                                                 |                                                |                   | Contrast 0.75, V vs AV | 3.6e-12          |
|                                            |     |                        |                                                |                      |                              |                                                                 |                                                |                   | Contrast 1, V vs AV    | 5.5e-8           |
| Onset response duration, V vs AV           | 4F  | Paired 2-way ANOVA     | F(vis)=17<br>F(aud)=129<br>F(interact)=1.4     | 367 neurons          | vis=3<br>aud=1<br>Interact=3 | p(vis)=1.3e-10<br>p(aud) = 8.7e-98<br>p(interact) = 0.23        |                                                |                   |                        |                  |
| Response coefficient of variation, V vs AV | 4H  | Paired 2-way ANOVA     | F(vis)=1.3<br>F(aud)=834<br>F(interact)=1.0    | 564 neurons          | vis=4<br>aud=1<br>Interact=4 | p(vis) = 0.28<br>p(aud) = 4.2e-103<br>p(interact) = 0.38        |                                                |                   |                        |                  |
| Sound induced movement                     | 5B  | Paired t-test          | t-stat = -7.2                                  | 9 recording sessions | 8                            | p = 9.1e-5                                                      |                                                |                   |                        |                  |
| Firing rate across movement range, V vs AV | 5F  | Unbalanced 2-way ANOVA | F(motion)=6.9<br>F(sound)=55<br>F(interact)=18 | Variable trial count | mot=2<br>aud=1<br>Interact=1 | p(motion) = 0.001<br>p(sound) = 1.4e-13<br>p(interact) = 1.8e-8 | Bonferroni corrected two-sample t-test         | 0.016             | Stationary, V vs AV    | 1.5e-14          |
|                                            |     |                        |                                                |                      |                              |                                                                 |                                                |                   | Low motion, V vs AV    | 7.1e-10          |
|                                            |     |                        |                                                |                      |                              |                                                                 |                                                |                   | High motion, V vs AV   | 0.60             |

|                                                            |    |                    |                                              |             | ct=2                         |                                                             |                                    |      |                        |         |
|------------------------------------------------------------|----|--------------------|----------------------------------------------|-------------|------------------------------|-------------------------------------------------------------|------------------------------------|------|------------------------|---------|
| PSTH, light vs light/sound                                 | 6F | Paired t-test      | 1391 unique t-stats                          | 295 neurons | 294                          | 1391 unique p-values, $\alpha=0.05/1391=3.6e-5$             |                                    |      |                        |         |
| PSTH, light vs light/motion                                | 6G | Paired t-test      | 1391 unique t-stats                          | 295 neurons | 294                          | 1391 unique p-values, $\alpha=0.05/1391=3.6e-5$             |                                    |      |                        |         |
| PSTH, light/sound vs light/sound/motion                    | 6H | Paired t-test      | 1391 unique t-stats                          | 295 neurons | 294                          | 1391 unique p-values, $\alpha=0.05/1391=3.6e-5$             |                                    |      |                        |         |
| Orientation decoding accuracy, individual neurons, V vs AV | 7E | Paired 2-way ANOVA | F(vis)=67<br>F(aud)=12<br>F(interact)=0.54   | 78 neurons  | vis=4<br>aud=1<br>interact=4 | p(vis)=4.8e-112<br>p(aud)=7.8e-4<br>p(interact)=0.71        |                                    |      |                        |         |
| Direction decoding accuracy, individual neurons, V vs AV   | 7G | Paired 2-way ANOVA | F(vis)=6.9<br>F(aud)=2.0<br>F(interact)=0.43 | 12 neurons  | vis=4<br>aud=1<br>interact=4 | p(vis)=2.1e-4<br>p(aud)=0.18<br>p(interact)=0.78            |                                    |      |                        |         |
| Orientation decoding accuracy, SVM, population, V vs AV    | 8E | 2-way ANOVA        | F(vis)=526<br>F(aud)=38<br>F(interact)=6     | 10 repeats  | vis=4<br>aud=1<br>interact=4 | p(vis) = 1.8e-61<br>p(aud) = 1.9e-8<br>p(interact) = 2.4e-4 | Bonferroni-corrected paired t-test | 0.01 | Contrast 0, V vs AV    | 0.12    |
|                                                            |    |                    |                                              |             |                              |                                                             |                                    |      | Contrast 0.25, V vs AV | 0.0016  |
|                                                            |    |                    |                                              |             |                              |                                                             |                                    |      | Contrast 0.5, V vs AV  | 0.0014  |
|                                                            |    |                    |                                              |             |                              |                                                             |                                    |      | Contrast 0.75, V vs AV | 0.0023  |
|                                                            |    |                    |                                              |             |                              |                                                             |                                    |      | Contrast 1, V vs AV    | 1       |
| Direction decoding accuracy, SVM, population, V vs AV      | 8F | 2-way ANOVA        | F(vis)=48<br>F(aud)=40<br>F(interact)=4.6    | 10 repeats  | vis=4<br>aud=1<br>interact=4 | p(vis) = 1.1e-21<br>p(aud) = 9.0e-9<br>p(interact) = 0.0019 | Bonferroni-corrected paired t-test | 0.01 | Contrast 0, V vs AV    | 0.55    |
|                                                            |    |                    |                                              |             |                              |                                                             |                                    |      | Contrast 0.25, V vs AV | 5.3e-5  |
|                                                            |    |                    |                                              |             |                              |                                                             |                                    |      | Contrast 0.5, V vs AV  | 0.0036  |
|                                                            |    |                    |                                              |             |                              |                                                             |                                    |      | Contrast 0.75, V vs AV | 0.17    |
|                                                            |    |                    |                                              |             |                              |                                                             |                                    |      | Contrast 1, V vs AV    | 0.0036  |
| Orientation decoding accuracy, MLE, population, V vs AV    | 8H | 2-way ANOVA        | F(vis)=682<br>F(aud)=0.27<br>F(interact)=18  | 10 repeats  | vis=4<br>aud=1<br>interact=4 | p(vis)=2.3e-66<br>p(aud)=0.61<br>p(interact)=9.6e-11        | Bonferroni-corrected paired t-test | 0.01 | Contrast 0, V vs AV    | 5.8e-4  |
|                                                            |    |                    |                                              |             |                              |                                                             |                                    |      | Contrast 0.25, V vs AV | 1.8e-4  |
|                                                            |    |                    |                                              |             |                              |                                                             |                                    |      | Contrast 0.5, V vs AV  | 0.30    |
|                                                            |    |                    |                                              |             |                              |                                                             |                                    |      | Contrast 0.75, V vs AV | 0.53    |
|                                                            |    |                    |                                              |             |                              |                                                             |                                    |      | Contrast 1, V vs AV    | 0.15    |
| Direction decoding accuracy, MLE, population, V vs AV      | 8I | 2-way ANOVA        | F(vis)=67<br>F(aud)=0.43<br>F(interact)=8.9  | 10 repeats  | vis=4<br>aud=1<br>interact=4 | p(vis)=4.6e-26<br>p(aud)=0.51<br>p(interact)=4.1e-6         | Bonferroni-corrected paired t-test | 0.01 | Contrast 0, V vs AV    | 0.037   |
|                                                            |    |                    |                                              |             |                              |                                                             |                                    |      | Contrast 0.25, V vs AV | 6.4e-6  |
|                                                            |    |                    |                                              |             |                              |                                                             |                                    |      | Contrast 0.5, V vs AV  | 0.036   |
|                                                            |    |                    |                                              |             |                              |                                                             |                                    |      | Contrast 0.75, V vs AV | 0.16    |
|                                                            |    |                    |                                              |             |                              |                                                             |                                    |      | Contrast 1, V vs AV    | 0.014   |
| Overall decoding accuracy, MLE, population, V vs AV        | 8L | 2-way ANOVA        | F(vis)=411<br>F(aud)=19<br>F(interact)=16    | 20 repeats  | vis=4<br>aud=1<br>interact=4 | p(vis)=2.2e-92<br>p(aud)=1.9e-5<br>p(interact)=2.7e-11      | Bonferroni-corrected paired t-test | 0.01 | Contrast 0, V vs AV    | 0.012   |
|                                                            |    |                    |                                              |             |                              |                                                             |                                    |      | Contrast 0.25, V vs AV | 1.4e-10 |
|                                                            |    |                    |                                              |             |                              |                                                             |                                    |      | Contrast 0.5, V vs AV  | 0.48    |
|                                                            |    |                    |                                              |             |                              |                                                             |                                    |      | Contrast 0.75, V vs AV | 0.0013  |
|                                                            |    |                    |                                              |             |                              |                                                             |                                    |      | Contrast 1, V vs AV    | 0.50    |
| Orientation decoding accuracy,                             | 9B | Paired 2-way       | F(vis) = 74<br>F(aud) = 19                   | 85 neurons  | vis=4<br>aud=                | p(vis) = 0<br>p(aud)=3.5e-5                                 |                                    |      |                        |         |

|                                                                                   |    |                    |                                                      |            |                              |                                                           |                                    |                     |                        |        |
|-----------------------------------------------------------------------------------|----|--------------------|------------------------------------------------------|------------|------------------------------|-----------------------------------------------------------|------------------------------------|---------------------|------------------------|--------|
| individual neurons, V vs AV                                                       |    | ANOVA              | F(interact) = 1.5                                    |            | 1 interact=4                 | p(interact)=0.21                                          |                                    |                     |                        |        |
| Orientation decoding accuracy, individual neurons, V vs motion-corrected AV       | 9B | Paired 2-way ANOVA | F(vis) = 64<br>F(aud) = 13<br>F(interact) = 3        | 85 neurons | vis=4<br>aud=1<br>interact=4 | p(vis) = 0<br>p(aud)=5.9e-4<br>p(interact)=0.019          | Bonferroni-corrected paired t-test | 0.01                | Contrast 0, V vs AV    | 0.019  |
|                                                                                   |    |                    |                                                      |            |                              |                                                           |                                    |                     | Contrast 0.25, V vs AV | 0.071  |
|                                                                                   |    |                    |                                                      |            |                              |                                                           |                                    |                     | Contrast 0.5, V vs AV  | 0.029  |
|                                                                                   |    |                    |                                                      |            |                              |                                                           |                                    |                     | Contrast 0.75, V vs AV | 0.011  |
|                                                                                   |    |                    |                                                      |            |                              |                                                           |                                    | Contrast 1, V vs AV | 0.0602                 |        |
| Orientation decoding accuracy, individual neurons, AV vs motion-corrected AV      | 9B | Paired 2-way ANOVA | F(vis) = 34<br>F(aud) = 3.8<br>F(interact) = 2.4     | 85 neurons | vis=4<br>aud=1<br>interact=4 | p(vis) = 7.7e-93<br>p(aud) = 0.055<br>p(interact) = 0.058 |                                    |                     |                        |        |
| Orientation decoding accuracy, individual neurons, V vs motion/sound-corrected AV | 9B | Paired 2-way ANOVA | F(vis) = 56<br>F(aud) = 0.36<br>F(interact) = 1.4    | 85 neurons | vis=4<br>aud=1<br>interact=4 | p(vis)=8.1e-95<br>p(aud)=0.55<br>p(interact)=0.24         |                                    |                     |                        |        |
| Population decoding accuracy, V vs AV                                             | 9D | 2-way ANOVA        | F(vis) = 166<br>F(aud) = 52<br>F(interact) = 8.2     | 10 repeats | vis=4<br>aud=1<br>interact=4 | p(vis)=1.1e-40<br>p(aud)=1.6e-10<br>p(interact)=1.1e-5    | Bonferroni-corrected paired t-test | 0.01                | Contrast 0, V vs AV    | 0.34   |
|                                                                                   |    |                    |                                                      |            |                              |                                                           |                                    |                     | Contrast 0.25, V vs AV | 2.2e-5 |
|                                                                                   |    |                    |                                                      |            |                              |                                                           |                                    |                     | Contrast 0.5, V vs AV  | 0.0019 |
|                                                                                   |    |                    |                                                      |            |                              |                                                           |                                    |                     | Contrast 0.75, V vs AV | 8.7e-6 |
|                                                                                   |    |                    |                                                      |            |                              |                                                           |                                    | Contrast 1, V vs AV | 0.013                  |        |
| Population decoding accuracy, V vs motion-corrected AV                            | 9D | 2-way ANOVA        | F(vis) = 147<br>F(aud) = 35<br>F(interact) = 4.8     | 10 repeats | vis=4<br>aud=1<br>interact=4 | p(vis)=1.4e-38<br>p(aud)=6.0e-8<br>p(interact)=0.0015     | Bonferroni-corrected paired t-test | 0.01                | Contrast 0, V vs AV    | 0.30   |
|                                                                                   |    |                    |                                                      |            |                              |                                                           |                                    |                     | Contrast 0.25, V vs AV | 0.0012 |
|                                                                                   |    |                    |                                                      |            |                              |                                                           |                                    |                     | Contrast 0.5, V vs AV  | 0.0022 |
|                                                                                   |    |                    |                                                      |            |                              |                                                           |                                    |                     | Contrast 0.75, V vs AV | 0.0044 |
|                                                                                   |    |                    |                                                      |            |                              |                                                           |                                    | Contrast 1, V vs AV | 0.35                   |        |
| Population decoding accuracy, V vs motion/sound-corrected AV                      | 9D | 2-way ANOVA        | F(vis) = 154<br>F(aud) = 0.50<br>F(interact) = 0.088 | 10 repeats | vis=4<br>aud=1<br>interact=4 | p(vis)=2.5e-39<br>p(aud) = 0.48<br>p(interact) = 0.99     |                                    |                     |                        |        |
